# Supplementary material for: Identification of Pyrimidine-Based Lead Compounds for Understudied Kinases Implicated in Driving Neurodegeneration
Source: PubMed Central journal article supplement — J Med Chem. 2021 Aug 1;65(2):1313–28. doi: 10.1021/acs.jmedchem.1c00440 (PMC8802302; doi:10.1021/acs.jmedchem.1c00440), 2021-08-01

## Supporting Information

### Identification of pyrimidine-based lead compounds for understudied kinases implicated in driving neurodegeneration

David H. Drewry<sup>⊥,†,‡</sup>, Joel K. Annor-Gyamfi<sup>⊥,†</sup>, Carrow I. Wells<sup>⊥,†</sup>, Julie E. Pickett<sup>⊥,†</sup>, Verena Dederer<sup>†,§</sup>, Franziska Preuss<sup>†,§</sup>, Sebastian Mathea<sup>†,§</sup>, Alison D. Axtman<sup>\*,⊥,†</sup>

<sup>⊥</sup>Structural Genomics Consortium, UNC Eshelman School of Pharmacy, University of North Carolina at Chapel Hill, Chapel Hill, NC, 27599, USA

<sup>†</sup>Division of Chemical Biology and Medicinal Chemistry, UNC Eshelman School of Pharmacy, University of North Carolina at Chapel Hill, Chapel Hill, NC, 27599, USA

<sup>‡</sup>UNC Lineberger Comprehensive Cancer Center, School of Medicine, University of North Carolina at Chapel Hill, Chapel Hill, NC, 27599, USA

<sup>§</sup>Institute for Pharmaceutical Chemistry, Johann Wolfgang Goethe-University, Max-von-Laue-Str. 9, 60438 Frankfurt am Main, Germany

<sup>§</sup>Structural Genomics Consortium, Buchmann Institute for Molecular Life Sciences, Johann Wolfgang Goethe-University, Max-von-Laue-Str. 15, 60438 Frankfurt am Main, Germany

\*Corresponding Author E-mail: [alison.axtman@unc.edu](mailto:alison.axtman@unc.edu).

## Table of Contents

|                                  |         |
|----------------------------------|---------|
| Table S1                         | S2      |
| Figure S1                        | S3–S8   |
| Figure S2                        | S9      |
| Table S2                         | S9      |
| Purity traces for lead compounds | S10–S11 |
| Spectra                          | S12–S32 |

**Table S1.** Enzymatic profiling of aminopyrimidine library.

| Compound | % control at 1 $\mu$ M <sup>[a]</sup> |       |       |                      |                      |                |      |                      |       |                      |                      |      |      |       |      |      |
|----------|---------------------------------------|-------|-------|----------------------|----------------------|----------------|------|----------------------|-------|----------------------|----------------------|------|------|-------|------|------|
|          | AAK1                                  | AURKB | BMP2K | DRAK1 <sup>[b]</sup> | DRAK2 <sup>[b]</sup> | IKK $\epsilon$ | JAK2 | MARK1 <sup>[b]</sup> | MARK2 | MARK3 <sup>[b]</sup> | MARK4 <sup>[b]</sup> | MLK1 | MLK3 | NUAK1 | TBK1 | ULK1 |
| 3        | 90                                    | 82    | 96    | 107                  | 59                   | 95             | 123  | 71                   | 90    | 96                   | 88                   | 72   | 91   | 73    | 81   | 78   |
| 4        | 61                                    | 102   | 73    | 25                   | 13                   | 12             | 99   | 79                   | 93    | 96                   | 100                  | 78   | 94   | 82    | 4    | 58   |
| 5        | 101                                   | 102   | 94    | 105                  | 88                   | 43             | 100  | 108                  | 100   | 111                  | 110                  | 90   | 89   | 97    | 10   | 106  |
| 6        | 12                                    | 7     | 7     | 58                   | 39                   | 32             | 3    | 66                   | 65    | 68                   | 61                   | 25   | 34   | 23    | 4    | 50   |
| 7        | 7                                     | 38    | 19    | 5                    | 5                    | 1              | 67   | 8                    | 19    | 35                   | 27                   | 21   | 36   | 22    | -1   | 3    |
| 8        | 81                                    | 90    | 101   | 106                  | 60                   | 63             | 114  | 108                  | 103   | 126                  | 113                  | 85   | 106  | 86    | 61   | 96   |
| 9        | 4                                     | 1     | 1     | 8                    | 4                    | 36             | 6    | -3                   | 5     | 16                   | 3                    | -1   | 2    | 1     | 21   | 3    |
| 10       | 54                                    | 22    | 47    | 63                   | 12                   | 55             | 106  | 49                   | 55    | 68                   | 49                   | 30   | 60   | 13    | 21   | 20   |
| 11       | 70                                    | 51    | 68    | 108                  | 84                   | 43             | 87   | 100                  | 98    | 109                  | 98                   | 72   | 68   | 83    | 10   | 88   |
| 12       | 82                                    | 82    | 86    | 103                  | 92                   | 73             | 95   | 107                  | 108   | 122                  | 101                  | 97   | 95   | 94    | 49   | 99   |
| 13       | 8                                     | 6     | 1     | 41                   | 23                   | 35             | 12   | 57                   | 57    | 63                   | 42                   | 30   | 24   | 11    | 1    | 66   |
| 14       | 49                                    | 2     | 18    | 50                   | 14                   | 55             | 82   | 1                    | 14    | 0                    | 4                    | 7    | 27   | 6     | 43   | 24   |
| 15       | 82                                    | 71    | 104   | 99                   | 91                   | 83             | 89   | 109                  | 104   | 126                  | 99                   | 77   | 94   | 90    | 87   | 88   |
| 16       | 73                                    | 53    | 80    | 82                   | 96                   | 79             | 62   | 104                  | 115   | 115                  | 99                   | 86   | 89   | 78    | 68   | 97   |
| 17       | 33                                    | 56    | 56    | 18                   | 17                   | 33             | 88   | 72                   | 82    | 92                   | 85                   | 79   | 86   | 87    | 36   | 75   |
| 18       | 1                                     | 5     | -1    | 0                    | 0                    | -2             | 10   | -6                   | 2     | -3                   | -1                   | 0    | -3   | 0     | -2   | 2    |
| 19       | 61                                    | 48    | 51    | 93                   | 96                   | 78             | 54   | 102                  | 102   | 113                  | 98                   | 81   | 95   | 79    | 33   | 92   |
| 20       | 59                                    | 5     | 58    | 78                   | 65                   | 80             | 81   | 75                   | 93    | 78                   | 68                   | 73   | 82   | 14    | 50   | 85   |
| 21       | 73                                    | 61    | 64    | 79                   | 77                   | 52             | 107  | 94                   | 93    | 112                  | 89                   | 89   | 72   | 89    | 6    | 82   |
| 22       | 12                                    | 11    | 8     | 2                    | 3                    | 3              | 68   | -4                   | 6     | 0                    | 7                    | 31   | 27   | 51    | -4   | 17   |
| MRT67307 | 6                                     | 5     | 3     | 3                    | 7                    | 4              | 46   | -5                   | 4     | -1                   | 5                    | 19   | 38   | 31    | -1   | 9    |
| MRT68921 | 4                                     | 8     | 3     | 3                    | 4                    | 4              | 44   | -1                   | 3     | -4                   | 3                    | 14   | 44   | 6     | 1    | 1    |
| BX-795   | 2                                     | 3     | 1     | 2                    | 4                    | 2              | 6    | -5                   | 3     | -4                   | 2                    | 4    | 1    | 2     | -3   | 4    |
| BX-912   | 5                                     | 2     | 2     | 6                    | 1                    | 44             | 24   | -4                   | 5     | -1                   | 2                    | 5    | 2    | 1     | 10   | 6    |
| GSK8612  | 37                                    | 87    | 30    | 93                   | 47                   | 23             | 70   | 90                   | 89    | 105                  | 79                   | 80   | 82   | 58    | 5    | 77   |

<sup>a</sup>Compounds tested at a single concentration (1  $\mu$ M) in duplicate. <sup>b</sup>IDG kinase; DRAK1 = STK17A and DRAK2 = STK17B.

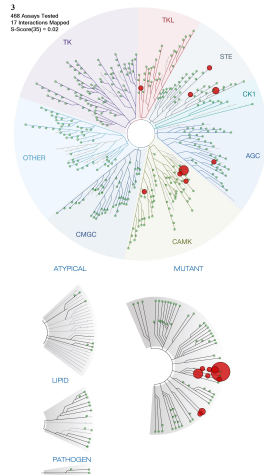

| WT kinase                  | % control at 1000nM |
|----------------------------|---------------------|
| DRAK2                      | 4.8                 |
| YSK4                       | 5.4                 |
| LRRK2                      | 11                  |
| NIM1                       | 14                  |
| MEK5                       | 23                  |
| MYLK2                      | 24                  |
| RSK4(Kin.Dom.1-N-terminal) | 28                  |
| MLCK                       | 30                  |
| MINK                       | 31                  |

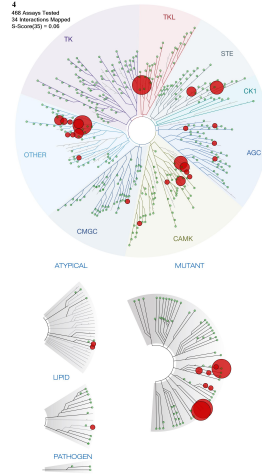

| WT kinase                  | % control at 1000nM |
|----------------------------|---------------------|
| LRRK2                      | 0                   |
| IKK-epsilon                | 0                   |
| YSK4                       | 0.4                 |
| DRAK1                      | 0.5                 |
| ULK2                       | 1.3                 |
| MKNK2                      | 1.5                 |
| TBK1                       | 1.7                 |
| GAK                        | 2.2                 |
| MEK5                       | 3.6                 |
| DRAK2                      | 4.7                 |
| ULK1                       | 9.5                 |
| ULK3                       | 11                  |
| GRK4                       | 13                  |
| SRPK3                      | 14                  |
| RIOK3                      | 16                  |
| PIPSK1A                    | 20                  |
| BMP2K                      | 22                  |
| SNARK                      | 23                  |
| RSK4(Kin.Dom.1-N-terminal) | 24                  |
| CIT                        | 24                  |
| DCAMKL3                    | 25                  |
| DAPK1                      | 26                  |
| RIOK1                      | 26                  |
| ROCK2                      | 28                  |
| AAK1                       | 29                  |
| TTK                        | 30                  |
| DAPK3                      | 34                  |

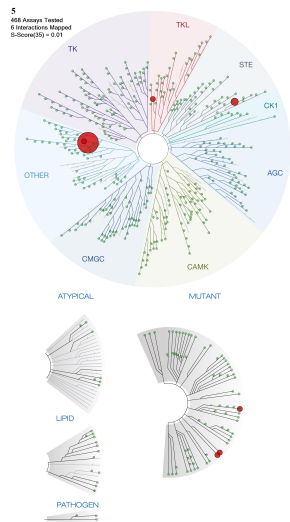

| WT kinase   | % control at 1000nM |
|-------------|---------------------|
| IKK-epsilon | 0                   |
| YSK4        | 8.5                 |
| TBK1        | 25                  |
| LRRK2       | 28                  |

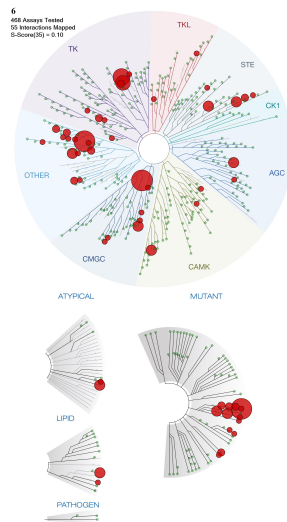

| WT kinase                  | % control at 1000nM |
|----------------------------|---------------------|
| TBK1                       | 0                   |
| PRP4                       | 0                   |
| JAK3(JH1domain-catalytic)  | 0.1                 |
| JAK2(JH1domain-catalytic)  | 0.9                 |
| MEK5                       | 1.2                 |
| YSK4                       | 1.4                 |
| BMP2K                      | 1.4                 |
| GRK4                       | 2.1                 |
| SRPK3                      | 3.4                 |
| RIOK1                      | 3.6                 |
| PIPSK1A                    | 4.7                 |
| SNARK                      | 4.8                 |
| STK16                      | 5.4                 |
| CSF1R-autoinhibited        | 5.8                 |
| TYK2(JH1domain-catalytic)  | 7.6                 |
| CSNK2A2                    | 9                   |
| AURKA                      | 9.2                 |
| MAP3K2                     | 9.3                 |
| AURKB                      | 9.6                 |
| AAK1                       | 11                  |
| CSNK2A1                    | 12                  |
| TRKA                       | 12                  |
| SRPK1                      | 13                  |
| SRPK2                      | 17                  |
| ULK3                       | 18                  |
| IKK-epsilon                | 20                  |
| VEGFR2                     | 21                  |
| MKNK2                      | 21                  |
| RIOK3                      | 22                  |
| LRRK2                      | 25                  |
| DRAK2                      | 25                  |
| FLT3                       | 25                  |
| ULK2                       | 26                  |
| PIPSK2B                    | 28                  |
| MAP3K3                     | 29                  |
| TAK1                       | 30                  |
| JNK1                       | 30                  |
| MAP4K2                     | 31                  |
| ULK1                       | 31                  |
| JNK3                       | 31                  |
| RSK4(Kin.Dom.1-N-terminal) | 32                  |
| CDKL5                      | 34                  |
| ZAP70                      | 35                  |
| NEK3                       | 35                  |

7

488 Assays Tested  
124 Interactions Mapped  
S-score(3) = 0.29

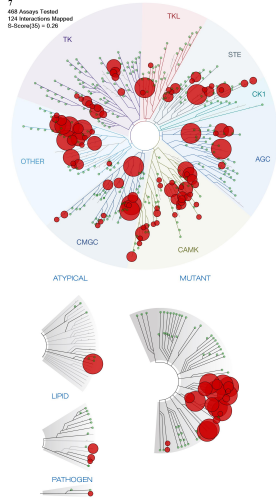

| WT kinase                 | % control at 1000nM |
|---------------------------|---------------------|
| PRP4                      | 0                   |
| MEK5                      | 0                   |
| BMP2K                     | 0                   |
| GRK4                      | 0                   |
| SRPK3                     | 0                   |
| RIOK1                     | 0                   |
| SRPK2                     | 0                   |
| ULK3                      | 0                   |
| IKK-epsilon               | 0                   |
| LRRK2                     | 0                   |
| CIT                       | 0                   |
| ULK2                      | 0.1                 |
| ULK1                      | 0.1                 |
| DRAK1                     | 0.1                 |
| BUB1                      | 0.1                 |
| JAK3(JH1domain-catalytic) | 0.2                 |
| YSK4                      | 0.3                 |
| DRAK2                     | 0.4                 |
| DCAMKL3                   | 0.5                 |
| MKNK2                     | 0.6                 |
| SBK1                      | 0.7                 |
| PDGFRB                    | 0.7                 |
| SNARK                     | 0.8                 |
| ROCK2                     | 0.8                 |
| GAK                       | 0.9                 |
| TAOK3                     | 1                   |
| FLT4                      | 1                   |
| CDK7                      | 1.2                 |
| CAMK2A                    | 1.4                 |
| TBK1                      | 1.5                 |
| MEK4                      | 1.7                 |
| TAOK1                     | 1.7                 |
| PIPSK1A                   | 1.8                 |
| MARK3                     | 2.1                 |
| ROCK1                     | 2.2                 |
| ALRKA                     | 2.4                 |
| AAK1                      | 3.3                 |
| CAMK2D                    | 3.3                 |
| ERK8                      | 3.4                 |
| SRPK1                     | 3.5                 |
| DCAMKL1                   | 3.5                 |
| JAK2(JH1domain-catalytic) | 3.8                 |
| TTK                       | 3.9                 |
| DAPK1                     | 4.4                 |

| WT kinase                     | % control at 1000nM |
|-------------------------------|---------------------|
| MAP4K2                        | 4.5                 |
| JAK1(JH1domain-catalytic)     | 5.1                 |
| PCTK1                         | 5.8                 |
| MAP3K15                       | 6                   |
| AURKC                         | 6.2                 |
| PIP5K2B                       | 6.5                 |
| CAMK2G                        | 6.9                 |
| KIT                           | 7.5                 |
| ASK1                          | 7.6                 |
| FLT3                          | 8.1                 |
| PDGFRA                        | 8.2                 |
| TNK1                          | 8.5                 |
| RSK4(Kin.Dom.1-N-terminal)    | 8.7                 |
| CAMK2B                        | 8.7                 |
| DAPK3                         | 8.8                 |
| TYK2(JH1domain-catalytic)     | 9                   |
| RSK3(Kin.Dom.2-C-terminal)    | 9.2                 |
| LKB1                          | 9.4                 |
| ANKK1                         | 11                  |
| JNK3                          | 13                  |
| RIPK5                         | 13                  |
| RSK1(Kin.Dom.2-C-terminal)    | 14                  |
| JNK1                          | 15                  |
| TSSK3                         | 15                  |
| PAK3                          | 16                  |
| FLT1                          | 17                  |
| ERN1                          | 17                  |
| VEGFR2                        | 18                  |
| DAPK2                         | 18                  |
| DMMPK                         | 18                  |
| IKK-alpha                     | 19                  |
| RP56KA4(Kin.Dom.2-C-terminal) | 20                  |
| CSF1R                         | 20                  |
| JNK2                          | 21                  |
| Sgk110                        | 21                  |
| PRKD2                         | 21                  |
| DCAMKL2                       | 21                  |
| ARK5                          | 22                  |
| CASK                          | 22                  |
| TAOK2                         | 24                  |
| PRKD1                         | 24                  |
| HUNK                          | 25                  |
| HPK1                          | 25                  |
| CLK2                          | 26                  |

| WT kinase                     | % control at 1000nM |
|-------------------------------|---------------------|
| NIK                           | 26                  |
| SIK2                          | 26                  |
| RSK4(Kin.Dom.2-C-terminal)    | 26                  |
| MEK1                          | 27                  |
| MEK2                          | 27                  |
| QSK                           | 28                  |
| TSSK1B                        | 28                  |
| PCTK2                         | 28                  |
| CLK1                          | 29                  |
| CAMK1B                        | 31                  |
| STK16                         | 32                  |
| PIPSK2C                       | 33                  |
| CSNK2A1                       | 34                  |
| BRSK2                         | 34                  |
| IRAK4                         | 35                  |
| RP56KA5(Kin.Dom.2-C-terminal) | 35                  |
| PLK4                          | 35                  |
| NIK                           | 26                  |
| SIK2                          | 26                  |
| RSK4(Kin.Dom.2-C-terminal)    | 26                  |
| MEK1                          | 27                  |
| MEK2                          | 27                  |
| QSK                           | 28                  |
| TSSK1B                        | 28                  |
| PCTK2                         | 28                  |
| CLK1                          | 29                  |
| CAMK1B                        | 31                  |
| STK16                         | 32                  |
| PIPSK2C                       | 33                  |
| CSNK2A1                       | 34                  |
| BRSK2                         | 34                  |
| IRAK4                         | 35                  |
| RP56KA5(Kin.Dom.2-C-terminal) | 35                  |
| PLK4                          | 35                  |

8

468 Assays Tested  
4 Interactions Mapped  
S-score(3) = 0.01

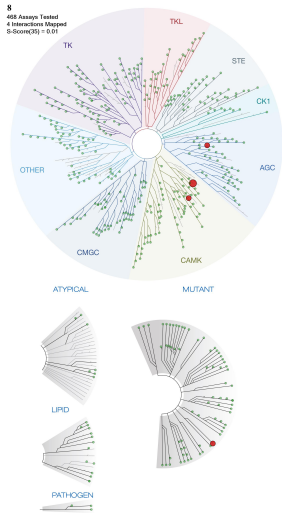

| WT kinase | % control at 1000nM |
|-----------|---------------------|
| DRAK2     | 6.6                 |
| YANK2     | 22                  |
| MKNK2     | 24                  |

9  
488 Assays Tested  
193 Interactions Mapped  
S-Score(C) = 0.40

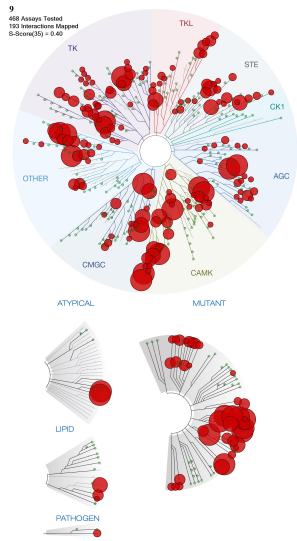

| WT kinase                    | % control at 1000nM |
|------------------------------|---------------------|
| JAK3(JH1domain-catalytic)    | 0                   |
| DRAK2                        | 0                   |
| BMP2K                        | 0                   |
| GRK4                         | 0                   |
| AURKA                        | 0                   |
| SRPK3                        | 0                   |
| RIOK1                        | 0                   |
| PRKD3                        | 0                   |
| PRP4                         | 0                   |
| RIOK3                        | 0                   |
| AURKC                        | 0                   |
| PRX                          | 0                   |
| DRAK1                        | 0                   |
| MARK3                        | 0                   |
| MARK1                        | 0                   |
| AMPK-alpha2                  | 0                   |
| PDGFRB                       | 0.1                 |
| YSK4                         | 0.2                 |
| SRPK2                        | 0.2                 |
| NIM1                         | 0.2                 |
| CDKL5                        | 0.3                 |
| LRRK2                        | 0.4                 |
| MEK5                         | 0.4                 |
| SNARK                        | 0.4                 |
| AURKB                        | 0.4                 |
| ARK5                         | 0.5                 |
| JAK2(JH1domain-catalytic)    | 0.6                 |
| SRPK1                        | 0.6                 |
| FLT3                         | 0.7                 |
| MAP4K2                       | 0.7                 |
| PIPSK1A                      | 0.9                 |
| ULK3                         | 1                   |
| CHEK1                        | 1.1                 |
| ULK2                         | 1.2                 |
| ULK1                         | 1.3                 |
| PRKD2                        | 1.4                 |
| MLK1                         | 1.8                 |
| PIPSK2B                      | 1.8                 |
| HPK1                         | 2.1                 |
| GAK                          | 2.4                 |
| FGFR1                        | 2.4                 |
| JAK1(JH2domain-pseudokinase) | 2.6                 |
| MARK4                        | 2.7                 |
| EPHB6                        | 2.8                 |

| WT kinase                    | % control at 1000nM |
|------------------------------|---------------------|
| TRKA                         | 2.9                 |
| OSK                          | 3                   |
| STK33                        | 3.1                 |
| MYLK2                        | 3.1                 |
| MST4                         | 3.2                 |
| LKB1                         | 3.2                 |
| VEGFR2                       | 3.3                 |
| CSNK2A1                      | 3.3                 |
| TAK1                         | 3.4                 |
| IRAK4                        | 3.5                 |
| MELK                         | 3.6                 |
| FLT4                         | 3.7                 |
| ITK                          | 3.7                 |
| AAK1                         | 3.9                 |
| CSNK2A2                      | 3.9                 |
| MEK2                         | 3.9                 |
| FGFR3                        | 3.9                 |
| CDK7                         | 4.3                 |
| DLK                          | 4.3                 |
| MLCK                         | 4.3                 |
| SGK                          | 4.6                 |
| MAP3K2                       | 5                   |
| MAST1                        | 5.1                 |
| JNK1                         | 5.2                 |
| MLK2                         | 5.4                 |
| IRAK1                        | 5.7                 |
| TAOK3                        | 5.9                 |
| TYK2(JH1domain-catalytic)    | 6                   |
| LZK                          | 6                   |
| MINK                         | 6.1                 |
| MKNK2                        | 6.9                 |
| PDGFRA                       | 6.9                 |
| MAP3K3                       | 6.9                 |
| ANKK1                        | 7.1                 |
| ABL1-phosphorylated          | 7.1                 |
| TBK1                         | 7.3                 |
| TRKB                         | 7.3                 |
| RET                          | 7.5                 |
| FGFR2                        | 7.5                 |
| JNK3                         | 7.6                 |
| TYK2(JH2domain-pseudokinase) | 8                   |
| KIT                          | 8.1                 |
| CAMKK2                       | 8.2                 |
| RSK2(Kin.Dom.1-N-terminal)   | 8.5                 |

| WT kinase                     | % control at 1000nM |
|-------------------------------|---------------------|
| TNIK                          | 8.8                 |
| STK16                         | 9.2                 |
| AMPK-alpha1                   | 9.6                 |
| RSK4(Kin.Dom.1-N-terminal)    | 9.7                 |
| MLK3                          | 9.7                 |
| PHKG2                         | 10                  |
| PKN1                          | 10                  |
| SIK                           | 10                  |
| FLT1                          | 11                  |
| MEK1                          | 11                  |
| PHKG1                         | 11                  |
| JNK2                          | 12                  |
| ABL1-nonphosphorylated        | 12                  |
| ROCK2                         | 12                  |
| TAOK1                         | 12                  |
| SYK                           | 13                  |
| RIPK4                         | 14                  |
| Sgk110                        | 14                  |
| ROCK1                         | 15                  |
| SGK3                          | 15                  |
| CSF1R                         | 15                  |
| CSF1R-autoinhibited           | 16                  |
| LATS2                         | 16                  |
| NEKS                          | 16                  |
| ZAP70                         | 17                  |
| CLK2                          | 17                  |
| PRKD1                         | 17                  |
| TIE1                          | 17                  |
| PKAC-beta                     | 17                  |
| SGK2                          | 17                  |
| SRC                           | 17                  |
| PAK3                          | 18                  |
| RPS6KA4(Kin.Dom.2-C-terminal) | 19                  |
| INSR                          | 19                  |
| AXL                           | 20                  |
| MERTK                         | 20                  |
| SIK2                          | 20                  |
| PDPK1                         | 20                  |
| NIK                           | 21                  |
| CIT                           | 21                  |
| PKN2                          | 21                  |
| PIPSK2C                       | 22                  |
| CDK4-cyclinD3                 | 22                  |
| CDK4-cyclinD1                 | 22                  |

| WT kinase   | % control at 1000nM |
|-------------|---------------------|
| IKK-epsilon | 23                  |
| DAPK3       | 23                  |
| MARK2       | 23                  |
| BMPR1B      | 23                  |
| BLK         | 23                  |
| LCK         | 23                  |
| BMPR2       | 24                  |
| MAP4K3      | 25                  |
| MEK4        | 26                  |
| TNK1        | 26                  |
| DAPK1       | 26                  |
| HIPK1       | 26                  |
| NEK3        | 26                  |
| SGK1        | 27                  |
| SLK         | 27                  |
| FGR         | 28                  |
| IKK-alpha   | 29                  |
| ABL2        | 30                  |
| CAMKK1      | 30                  |
| MAPKAPK5    | 30                  |
| TRCK        | 31                  |
| IRAK3       | 31                  |
| CDK1        | 32                  |
| PAK2        | 33                  |
| MAP4K5      | 33                  |
| MAP3K15     | 33                  |
| PKAC-alpha  | 33                  |
| FYN         | 34                  |
| DYRK1B      | 34                  |
| CHEK2       | 34                  |
| YES         | 35                  |

10  
488 Assays Tested  
93 Interactions Mapped  
S-Score(S) = 0.19

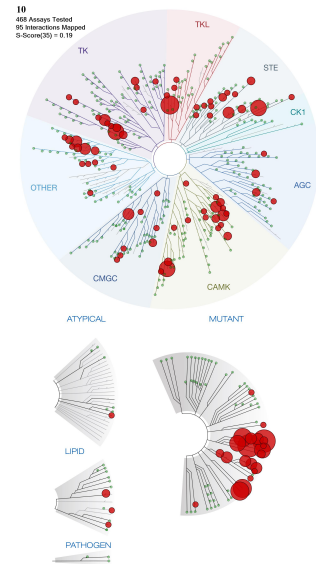

| WT kinase                     | % control at 1000nM |
|-------------------------------|---------------------|
| LRRK2                         | 0.1                 |
| PDGFRB                        | 0.5                 |
| YSK4                          | 0.5                 |
| SNARK                         | 0.8                 |
| MYLK2                         | 1.1                 |
| MEK5                          | 1.3                 |
| MLCK                          | 1.5                 |
| ULK3                          | 3.1                 |
| AURKA                         | 3.2                 |
| FLT4                          | 4.2                 |
| CDK7                          | 4.8                 |
| JAK3(JH1domain-catalytic)     | 5.1                 |
| ULK1                          | 5.4                 |
| HPK1                          | 5.4                 |
| RSK4(Kin.Dom.1-N-terminal)    | 5.5                 |
| DRAK2                         | 6.2                 |
| ARK5                          | 6.2                 |
| RPS6KA4(Kin.Dom.2-C-terminal) | 6.5                 |
| FLT3                          | 6.6                 |
| AURKC                         | 6.8                 |
| MKNK2                         | 6.8                 |
| GRK4                          | 7.3                 |
| MINK                          | 7.3                 |
| PDGFRA                        | 7.6                 |
| PIK4CB                        | 8.2                 |
| TBK1                          | 8.7                 |
| SRPK3                         | 9.1                 |
| MEK4                          | 9.3                 |
| BMP2K                         | 12                  |
| DRAK1                         | 12                  |
| NIM1                          | 12                  |
| MAP4K2                        | 12                  |
| PIPSK1A                       | 12                  |
| VEGFR2                        | 12                  |
| TNIK                          | 12                  |
| RIOK1                         | 13                  |
| RSK2(Kin.Dom.1-N-terminal)    | 13                  |
| ULK2                          | 14                  |
| PAK3                          | 14                  |
| PIPSK2C                       | 14                  |
| SRPK1                         | 15                  |
| CSNK2A1                       | 16                  |
| GAK                           | 19                  |
| KIT                           | 19                  |

| WT kinase                     | % control at 1000nM |
|-------------------------------|---------------------|
| TNK1                          | 19                  |
| PRKD3                         | 20                  |
| STK33                         | 21                  |
| ANKK1                         | 21                  |
| JAK2(JH1domain-catalytic)     | 22                  |
| JNK1                          | 23                  |
| JNK3                          | 24                  |
| INSR                          | 24                  |
| AURKB                         | 26                  |
| TAOK3                         | 27                  |
| DAPK3                         | 27                  |
| ERK8                          | 27                  |
| MARK4                         | 28                  |
| CSF1R                         | 28                  |
| RIPK4                         | 30                  |
| DAPK1                         | 30                  |
| SLK                           | 30                  |
| MST2                          | 30                  |
| AAK1                          | 31                  |
| ROCK1                         | 31                  |
| MAP3K15                       | 31                  |
| PRP4                          | 32                  |
| IRAK1                         | 32                  |
| PHKG1                         | 32                  |
| SBK1                          | 32                  |
| FGFR3                         | 33                  |
| JNK2                          | 33                  |
| TAOK1                         | 33                  |
| RPS6KAS(Kin.Dom.2-C-terminal) | 33                  |
| RSK3(Kin.Dom.2-C-terminal)    | 33                  |
| MYO3B                         | 34                  |
| FGFR2                         | 35                  |
| PHKG2                         | 35                  |

11  
408 Assays Tested  
12 Interactions Mapped  
S-Score(95) = 0.02

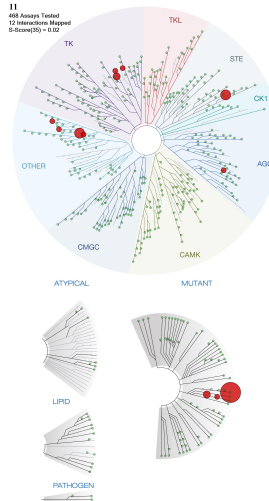

| WT kinase                  | % control at 1000nM |
|----------------------------|---------------------|
| TBK1                       | 3.8                 |
| YSK4                       | 4.1                 |
| JAK2(JH1domain-catalytic)  | 8.6                 |
| IKK-epsilon                | 13                  |
| TRKA                       | 20                  |
| RSK4(kin.Dom.1-N-terminal) | 25                  |
| AURKB                      | 27                  |
| JAK3(JH1domain-catalytic)  | 29                  |
| ULK2                       | 33                  |

12  
408 Assays Tested  
13 Interactions Mapped  
S-Score(95) = 0.00

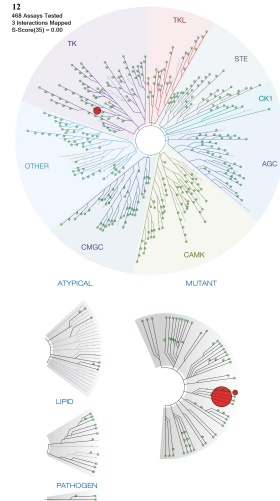

| WT kinase           | % control at 1000nM |
|---------------------|---------------------|
| CSF1R-autoinhibited | 6.6                 |

13  
408 Assays Tested  
43 Interactions Mapped  
S-Score(95) = 0.00

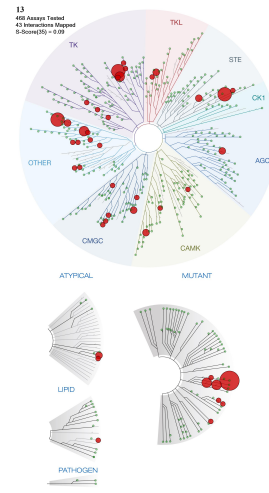

| WT kinase                 | % control at 1000nM |
|---------------------------|---------------------|
| JAK3(JH1domain-catalytic) | 0.4                 |
| AURKB                     | 0.8                 |
| YSK4                      | 0.9                 |
| TBK1                      | 3                   |
| JAK2(JH1domain-catalytic) | 3                   |
| AURKA                     | 5.6                 |
| BMPR2                     | 5.7                 |
| RIOK3                     | 5.7                 |
| SNARK                     | 6                   |
| MEK5                      | 8.3                 |
| GRK4                      | 8.6                 |
| SRPK3                     | 9.4                 |
| VEGFR2                    | 11                  |
| BMP2K                     | 11                  |
| RIPK4                     | 12                  |
| CSNK2A2                   | 12                  |
| JNK3                      | 14                  |
| PIPSK1A                   | 14                  |
| TYK2(JH1domain-catalytic) | 16                  |
| MNPK2                     | 16                  |
| AAK1                      | 16                  |
| STK16                     | 17                  |
| CDK7                      | 19                  |
| TRKA                      | 19                  |
| RIOK1                     | 19                  |
| JNK2                      | 21                  |
| JNK1                      | 23                  |
| HUNK                      | 24                  |
| SBK1                      | 24                  |
| PDGFRA                    | 28                  |
| CSNK2A1                   | 29                  |
| MAP3K2                    | 29                  |
| CSF1R-autoinhibited       | 30                  |
| SRPK1                     | 31                  |
| IKK-epsilon               | 32                  |
| TRKB                      | 35                  |

14  
408 Assays Tested  
50 Interactions Mapped  
S-Score(95) = 0.1

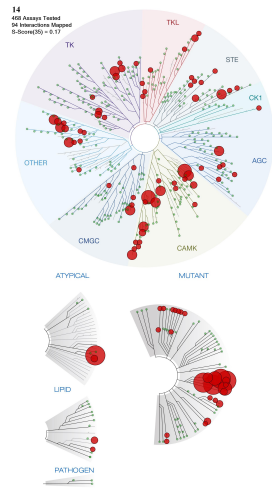

| WT kinase                  | % control at 1000nM |
|----------------------------|---------------------|
| RIOK3                      | 0                   |
| DRAK1                      | 0.5                 |
| NIM1                       | 0.6                 |
| DRAK2                      | 1                   |
| YSK4                       | 1.1                 |
| AURKB                      | 1.2                 |
| GRK4                       | 1.4                 |
| MARK3                      | 1.7                 |
| BMP2K                      | 2.2                 |
| ARK5                       | 2.6                 |
| JAK3(JH1domain-catalytic)  | 2.7                 |
| SRPK3                      | 2.9                 |
| SRPK3                      | 3                   |
| ULK2                       | 3.6                 |
| CHEK1                      | 4.3                 |
| DAPK3                      | 5.3                 |
| PDGFRB                     | 5.6                 |
| AURKC                      | 6.4                 |
| SNARK                      | 6.5                 |
| RIOK1                      | 6.8                 |
| JAK2(JH1domain-catalytic)  | 7.2                 |
| MEK5                       | 7.4                 |
| PIPSK1A                    | 7.6                 |
| ULK1                       | 8.2                 |
| FLT3                       | 8.3                 |
| MLK1                       | 8.6                 |
| TRKA                       | 9.6                 |
| RSK4(kin.Dom.1-N-terminal) | 11                  |
| LRRK2                      | 13                  |
| TBK1                       | 14                  |
| AURKA                      | 14                  |
| MLK3                       | 14                  |
| VRK2                       | 14                  |
| SRPK1                      | 16                  |
| TAK1                       | 17                  |
| MINK                       | 17                  |
| SIK2                       | 17                  |
| PRP4                       | 18                  |
| MST4                       | 18                  |
| RSK2(kin.Dom.1-N-terminal) | 18                  |
| PRKD2                      | 18                  |
| MELK                       | 20                  |
| TRKB                       | 21                  |
| GAK                        | 21                  |

| WT kinase                     | % control at 1000nM |
|-------------------------------|---------------------|
| SRPK2                         | 22                  |
| MAP3K2                        | 23                  |
| RP56KA4(kin.Dom.2-C-terminal) | 24                  |
| PKN1                          | 24                  |
| PRKCQ                         | 26                  |
| MAP3K3                        | 27                  |
| MARK2                         | 27                  |
| IRAK4                         | 28                  |
| IRAK1                         | 28                  |
| MARK1                         | 28                  |
| IKK-epsilon                   | 30                  |
| HPK1                          | 30                  |
| PHKG1                         | 30                  |
| MAP4K2                        | 31                  |
| TNIK                          | 32                  |
| CDK7                          | 33                  |
| S6K1                          | 33                  |
| CAMKK2                        | 33                  |
| MERTK                         | 33                  |
| SIK                           | 33                  |
| SIK                           | 33                  |
| AAK1                          | 34                  |
| PDGFRA                        | 34                  |
| MYLK2                         | 34                  |
| ANKK1                         | 35                  |
| PIPSK2B                       | 35                  |
| PHKG2                         | 35                  |

15  
408 Assays Tested  
8 Interactions Mapped  
S-Score(95) = 0.01

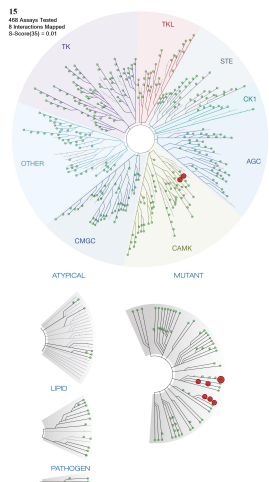

| WT kinase | % control at 1000nM |
|-----------|---------------------|
| MYLK2     | 15                  |
| DRAK2     | 32                  |

16  
408 Assays Tested  
4 Interactions Mapped  
S-Score(95) = 0.01

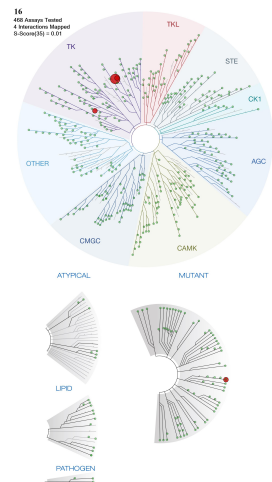

| WT kinase                 | % control at 1000nM |
|---------------------------|---------------------|
| TYK2(JH1domain-catalytic) | 1                   |
| JAK2(JH1domain-catalytic) | 13                  |
| CSF1R-autoinhibited       | 18                  |

17  
493 Assays Tested  
17 Interactions Mapped  
S-Score(3) = 0.03

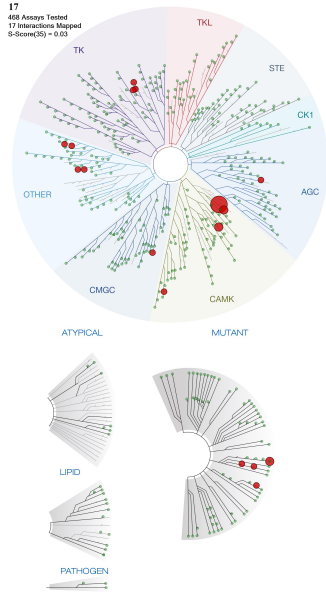

| WT kinase                 | % control at 1000nM |
|---------------------------|---------------------|
| DRAK1                     | 0.8                 |
| DRAK2                     | 5.3                 |
| MKNK2                     | 9                   |
| TYK2(JH1domain-catalytic) | 11                  |
| AAK1                      | 22                  |
| AURKC                     | 24                  |
| SIK2                      | 24                  |
| AURKA                     | 26                  |
| JAK2(JH1domain-catalytic) | 27                  |
| BMP2K                     | 30                  |
| GRK4                      | 30                  |
| SRPK3                     | 33                  |
| JAK3(JH1domain-catalytic) | 35                  |

18  
468 Assays Tested  
192 Interactions Mapped  
S-Score(3) = 0.36

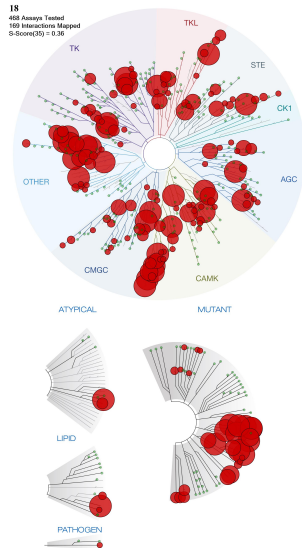

| WT kinase                 | % control at 1000nM |
|---------------------------|---------------------|
| DRAK1                     | 0                   |
| MKNK2                     | 0                   |
| SIK2                      | 0                   |
| AURKA                     | 0                   |
| JAK2(JH1domain-catalytic) | 0                   |
| BMP2K                     | 0                   |
| JAK3(JH1domain-catalytic) | 0                   |
| SRPK1                     | 0                   |
| TBK1                      | 0                   |
| PIP5K2B                   | 0                   |
| CHEK2                     | 0                   |
| ULK1                      | 0                   |
| IRAK3                     | 0                   |
| ULK2                      | 0                   |
| BUB1                      | 0                   |
| YSK4                      | 0                   |
| IKK-epsilon               | 0                   |
| PDGFRB                    | 0                   |
| CDK11                     | 0                   |
| OSK                       | 0                   |
| FLT3                      | 0                   |
| MLK2                      | 0                   |
| RIOK3                     | 0                   |
| ARKS                      | 0                   |
| SBK1                      | 0                   |
| PRKX                      | 0                   |
| CHEK1                     | 0                   |
| MARK1                     | 0                   |
| PKN1                      | 0                   |
| MARK3                     | 0                   |
| DRAK2                     | 0.1                 |
| TAOK3                     | 0.1                 |
| MARK2                     | 0.1                 |
| DCAMKL3                   | 0.1                 |
| TYK2(JH1domain-catalytic) | 0.2                 |
| AURKC                     | 0.2                 |
| AURKB                     | 0.2                 |
| SNARK                     | 0.3                 |
| MEK5                      | 0.3                 |
| ULK3                      | 0.3                 |
| GAK                       | 0.3                 |
| BMPR2                     | 0.4                 |
| CIT                       | 0.5                 |
| LRRK2                     | 0.6                 |

| WT kinase                    | % control at 1000nM |
|------------------------------|---------------------|
| CDK7                         | 0.6                 |
| ROCK2                        | 0.6                 |
| TAOK1                        | 0.6                 |
| AAK1                         | 0.7                 |
| JAK1(JH1domain-catalytic)    | 1.1                 |
| ERK8                         | 1.1                 |
| Sgk110                       | 1.4                 |
| CDKL5                        | 1.7                 |
| MARK4                        | 1.8                 |
| LKB1                         | 2.2                 |
| MELK                         | 2.3                 |
| RIOK1                        | 2.8                 |
| PLK4                         | 3                   |
| RET                          | 3.1                 |
| SRPK2                        | 3.2                 |
| SRPK3                        | 3.3                 |
| FLT4                         | 3.3                 |
| MLK3                         | 3.3                 |
| PDGFRA                       | 3.4                 |
| ANKK1                        | 3.6                 |
| ROCK1                        | 3.6                 |
| MAP4K2                       | 3.8                 |
| CLK2                         | 4.5                 |
| FYN                          | 4.9                 |
| PCTK1                        | 5.1                 |
| CDK4-cyclinD3                | 5.4                 |
| MEK4                         | 5.4                 |
| PIP5K1A                      | 5.8                 |
| NEK5                         | 5.8                 |
| TRKA                         | 6                   |
| CAMK2A                       | 6.1                 |
| MAP3K3                       | 6.3                 |
| GRK4                         | 6.4                 |
| PKN2                         | 6.8                 |
| TAK1                         | 6.9                 |
| CSNK2A2                      | 7.2                 |
| PAK3                         | 7.2                 |
| JAK1(JH2domain-pseudokinase) | 7.6                 |
| KIT                          | 7.7                 |
| FLT1                         | 8.2                 |
| DAPK1                        | 8.2                 |
| MAP3K2                       | 8.4                 |
| SIK                          | 8.4                 |
| STK16                        | 8.4                 |

| WT kinase                  | % control at 1000nM |
|----------------------------|---------------------|
| MLK1                       | 9.1                 |
| CDC2L5                     | 9.9                 |
| SYK                        | 10                  |
| MEK2                       | 11                  |
| IRAK4                      | 11                  |
| TNK1                       | 11                  |
| TAOK2                      | 11                  |
| CAMKK2                     | 11                  |
| JNK3                       | 11                  |
| CASK                       | 11                  |
| AMPK-alpha2                | 11                  |
| MEK1                       | 12                  |
| CDK4-cyclinD1              | 12                  |
| RIPK4                      | 13                  |
| AMPK-alpha1                | 13                  |
| SGK                        | 14                  |
| JNK1                       | 14                  |
| PIP5K2C                    | 15                  |
| MAP3K15                    | 16                  |
| ZAK                        | 16                  |
| VEGFR2                     | 17                  |
| BRSK2                      | 17                  |
| IRAK1                      | 18                  |
| DMPK                       | 18                  |
| TIE1                       | 19                  |
| CAMK2D                     | 19                  |
| JNK2                       | 19                  |
| TTK                        | 20                  |
| CSF1R                      | 20                  |
| PHKG2                      | 20                  |
| PHKG1                      | 21                  |
| TRKB                       | 24                  |
| PRP4                       | 24                  |
| CSNK2A1                    | 25                  |
| RSK4(Kin.Dom.1-N-terminal) | 25                  |
| FGFR1                      | 25                  |
| HPK1                       | 26                  |
| DAPK3                      | 26                  |
| MKNK1                      | 27                  |
| CAMK2G                     | 28                  |
| DYRK2                      | 28                  |
| TGFBF2                     | 28                  |
| IKK-alpha                  | 29                  |
| ICK                        | 29                  |

| WT kinase | % control at 1000nM |
|-----------|---------------------|
| SGK3      | 29                  |
| ERN1      | 29                  |
| BRSK1     | 30                  |
| DCAMKL1   | 31                  |
| PRKD1     | 31                  |
| MAST1     | 32                  |
| SGK2      | 33                  |
| PDPK1     | 33                  |
| PCTK2     | 34                  |
| CDK2      | 34                  |
| TSSK3     | 35                  |
| LATS2     | 35                  |

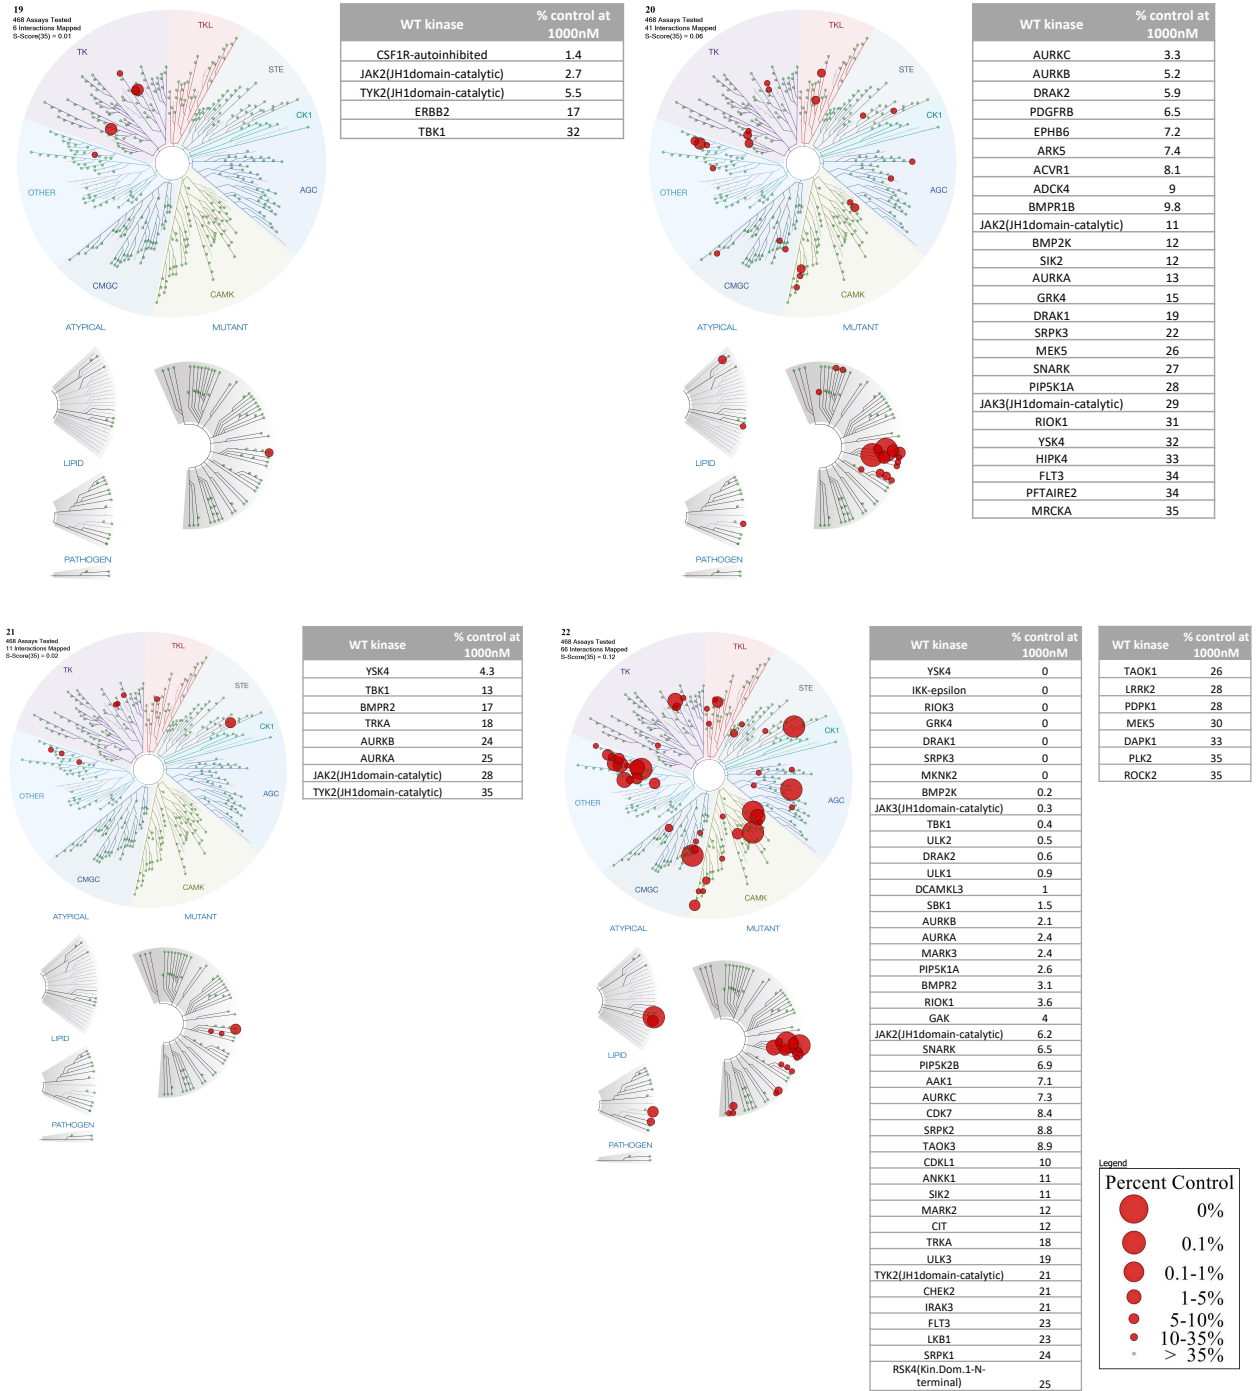

**Figure S1.** Treepots and all WT kinases inhibited > 90% at 1  $\mu$ M by compounds 3-22.



| Kinase | Above outer lipophilic pocket | Turn in Gly-rich loop | Turn in Gly-rich loop | Conserved Val above purine | Conserved Ala above purine | Conserved Lys | Conserved Glu on C-helix | On C-helix | Back pocket on C-helix | Back pocket | Back pocket | Gatekeeper | Hinge inner H-bond acceptor | Hinge | Hinge donor & outer H-bond acceptor | Outer hinge | Outer hinge | Solvent front | Solvent front & sugar pocket sidechain | Surface helix | Surface helix | Gamma-phosphate region | Sugar pocket carbonyl | Mg binding | Outer hydrophobe below purine | Inner hydrophobe below purine | DFG Asp | DFG Phe |
|--------|-------------------------------|-----------------------|-----------------------|----------------------------|----------------------------|---------------|--------------------------|------------|------------------------|-------------|-------------|------------|-----------------------------|-------|-------------------------------------|-------------|-------------|---------------|----------------------------------------|---------------|---------------|------------------------|-----------------------|------------|-------------------------------|-------------------------------|---------|---------|
| TBK1   | L                             | A                     | T                     | V                          | A                          | K             | E                        | F          | L                      | V           | L           | M          | E                           | F     | C                                   | P           | C           | G             | S                                      | Y             | T             | K                      | G                     | N          | M                             | T                             | D       | F       |
| ULK2   | V                             | A                     | F                     | V                          | A                          | K             | E                        | I          | L                      | V           | L           | M          | E                           | Y     | C                                   | N           | G           | G             | D                                      | A             | D             | K                      | Q                     | N          | L                             | A                             | D       | F       |
| PDK1   | L                             | S                     | F                     | V                          | A                          | K             | E                        | R          | M                      | V           | F           | L          | S                           | Y     | A                                   | K           | N           | -             | E                                      | L             | K             | K                      | E                     | N          | L                             | T                             | D       | F       |
| DRAK1  | L                             | K                     | F                     | V                          | A                          | K             | E                        | I          | L                      | I           | L           | L          | E                           | Y     | A                                   | A           | G           | G             | E                                      | F             | D             | K                      | Q                     | N          | L                             | V                             | D       | F       |
| MARK3  | I                             | N                     | F                     | V                          | A                          | K             | E                        | V          | M                      | V           | L           | M          | E                           | Y     | A                                   | S           | G           | G             | K                                      | F             | D             | K                      | E                     | N          | L                             | A                             | D       | F       |
| MARK4  | I                             | N                     | F                     | V                          | A                          | K             | E                        | V          | M                      | V           | L           | M          | E                           | Y     | A                                   | S           | A           | G             | E                                      | F             | D             | Q                      | E                     | N          | L                             | A                             | D       | F       |
| BMP2K  | L                             | G                     | F                     | L                          | V                          | N             | E                        | I          | M                      | V           | I           | M          | E                           | Y     | C                                   | R           | A           | G             | Q                                      | V             | N             | K                      | E                     | N          | L                             | C                             | D       | F       |

**Figure S2.** Sequence alignment of solved and understudied kinases that bind aminopyrimidines with high affinity.

**Table S2.** X-Ray crystallography data collection and refinement statistics.

| MARK3-Compound 9                              |                             |
|-----------------------------------------------|-----------------------------|
| <b>PDB ID</b>                                 | 7P1L                        |
| <b>Space group</b>                            | P 1 2 <sub>1</sub> 1        |
| <b>Cell parameters</b>                        |                             |
| a, b, c (Å)                                   | 50.99, 95.73, 68.58         |
| α, β, γ (°)                                   | 90, 91.98, 90               |
| <b>Resolution (Å)</b>                         | 47.87 - 1.95 (2.02 - 1.95)* |
| <b>Unique reflexions</b>                      | 47368 (4760)*               |
| <b>Completeness for range (%)</b>             | 98.7 (99.4)*                |
| <b>Multiplicity</b>                           | 3.5 (3.6)*                  |
| <b>R<sub>merge</sub></b>                      | 0.079 (0.543)*              |
| <b>CC1/2</b>                                  | 0.996 (0.782)*              |
| <b>I/σ(I)</b>                                 | 11.8 (2.5)*                 |
| <b>Wavelength (Å)</b>                         | 1.00002                     |
| <b>Phasing</b>                                | MR                          |
| <b>R<sub>work</sub>, R<sub>free</sub> (%)</b> | 21.0, 24.2                  |
| <b>Number of atoms</b>                        |                             |
| protein, inhibitor, ethylene glycol, solvent  | 4578, 58, 12, 103           |
| <b>B-factors (Å<sup>2</sup>)</b>              |                             |
| protein, inhibitor, ethylene glycol, solvent  | 34.3, 33.5, 26.8, 31.0      |
| <b>rmsd bond (Å)</b>                          | 0.01                        |
| <b>rmsd angle (°)</b>                         | 1.05                        |
| <b>Ramachandran statistics</b>                |                             |
| favored, outliers (%)                         | 97.6, 0                     |

\*Values in parentheses correspond to the highest resolution shell

MaxPeak: 100.00%  
Ret\_Time: 0.971 min

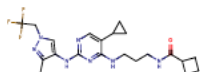

Mol Wt 451.49  
Exact Mass 451.27

| # | Time  | Area%  |
|---|-------|--------|
| 1 | 0.971 | 100.00 |

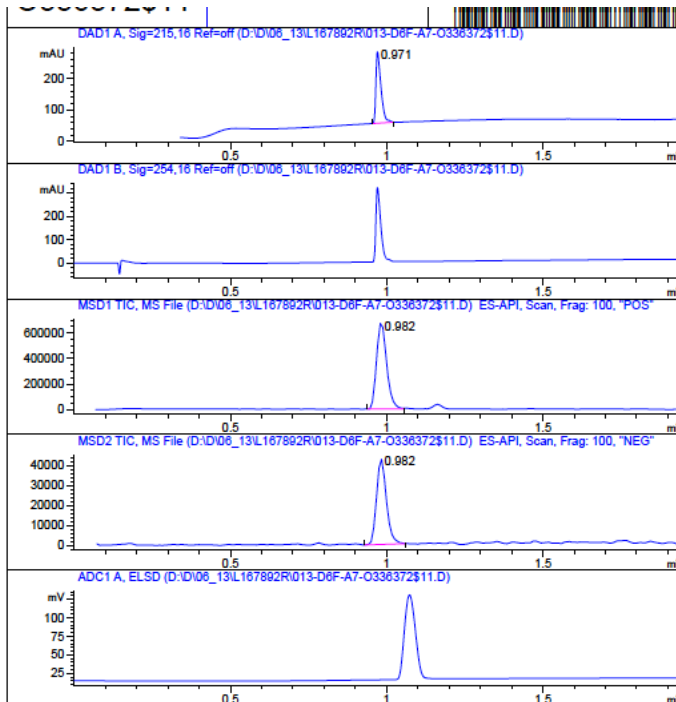

LC Chromatogram for 4

MaxPeak: 98.96%  
Ret\_Time: 0.810 min

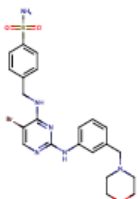

Mol Wt 533.44  
Exact Mass 534.11

| # | Time  | Area% |
|---|-------|-------|
| 1 | 0.747 | 1.64  |
| 2 | 0.810 | 98.96 |

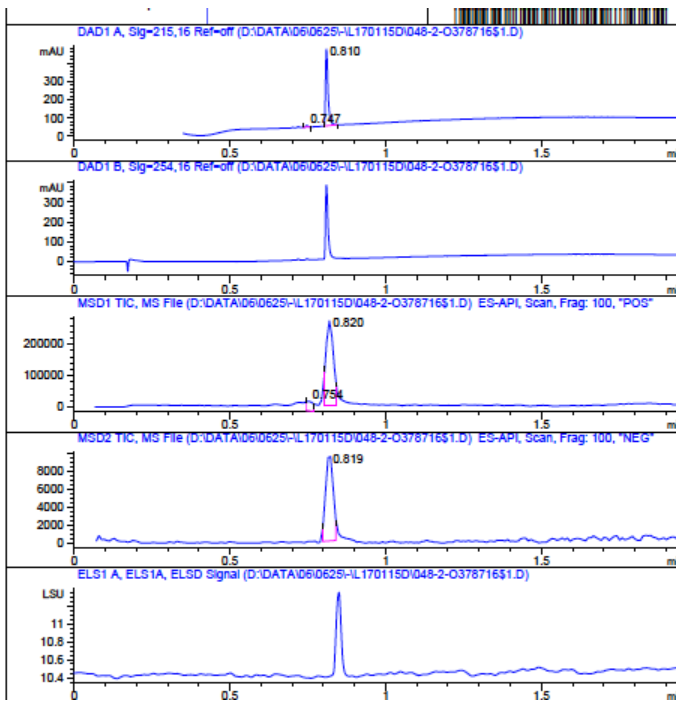

LC Chromatogram for 6

MaxPeak: 100.00%  
Ret\_Time: 1.051 min

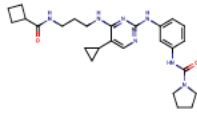

Mol Wt 477.6  
Exact Mass 477.33

| # | Time  | Area%  |
|---|-------|--------|
| 1 | 1.051 | 100.00 |

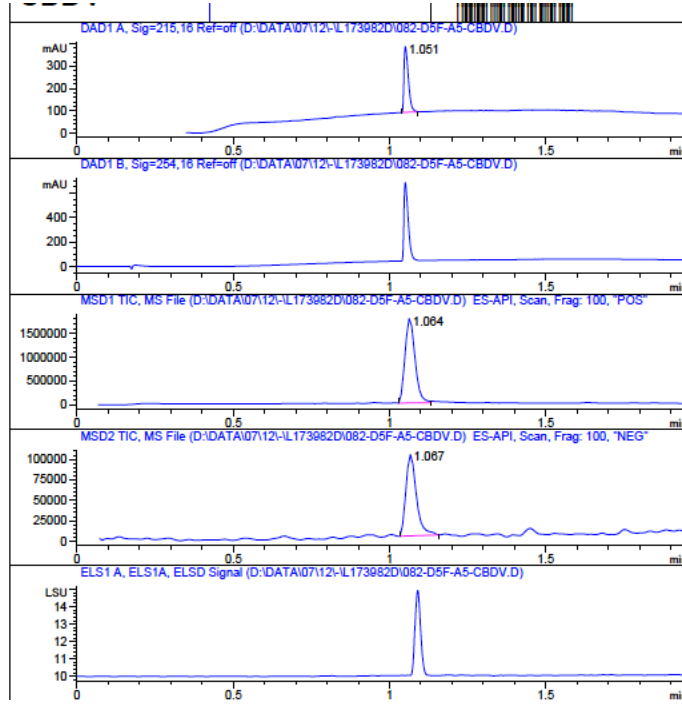

LC Chromatogram for 22

**<sup>1</sup>H NMR of N<sup>4</sup>-(2-(1H-imidazol-4-yl)ethyl)-5-cyclopropyl-N<sup>2</sup>-(3-methyl-1-(2,2,2-trifluoroethyl)-1H-pyrazol-4-yl)pyrimidine-2,4-diamine (3)**

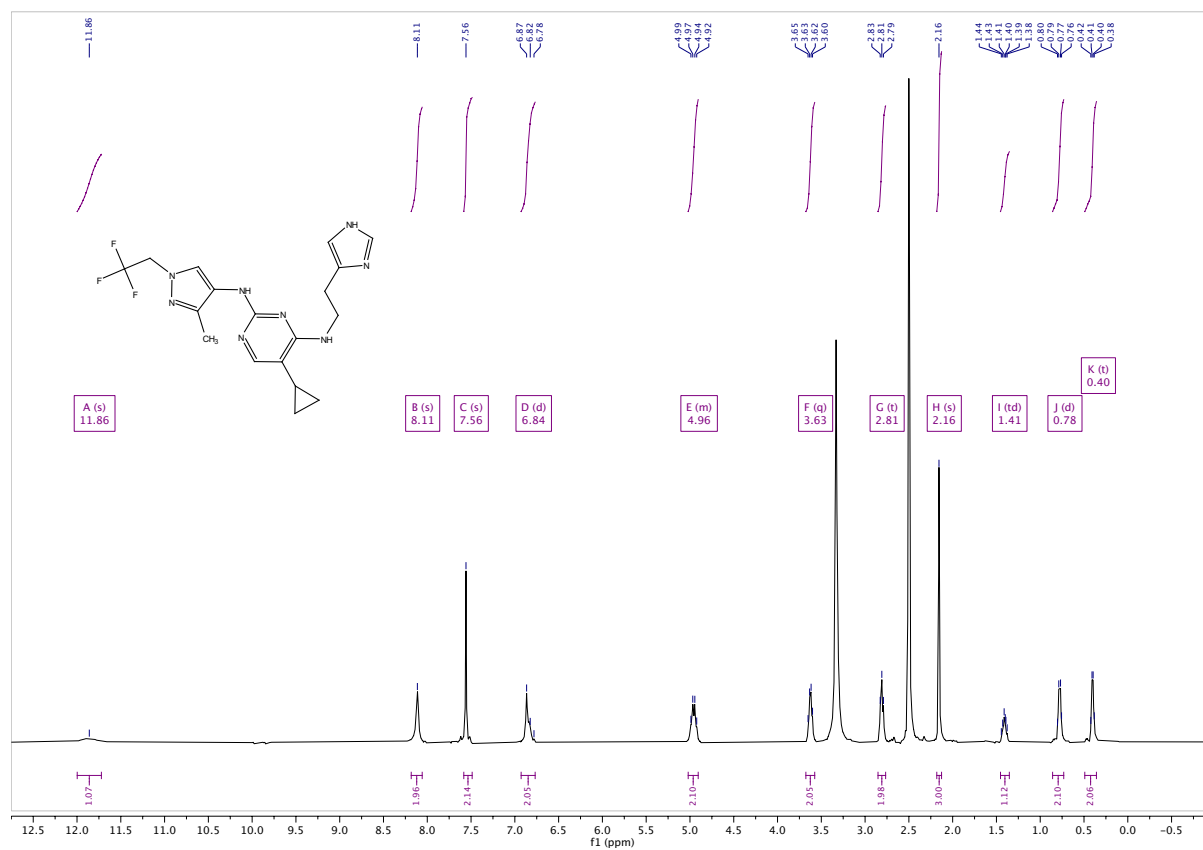

**<sup>13</sup>C NMR of N<sup>4</sup>-(2-(1H-imidazol-4-yl)ethyl)-5-cyclopropyl-N<sup>2</sup>-(3-methyl-1-(2,2,2-trifluoroethyl)-1H-pyrazol-4-yl)pyrimidine-2,4-diamine (3)**

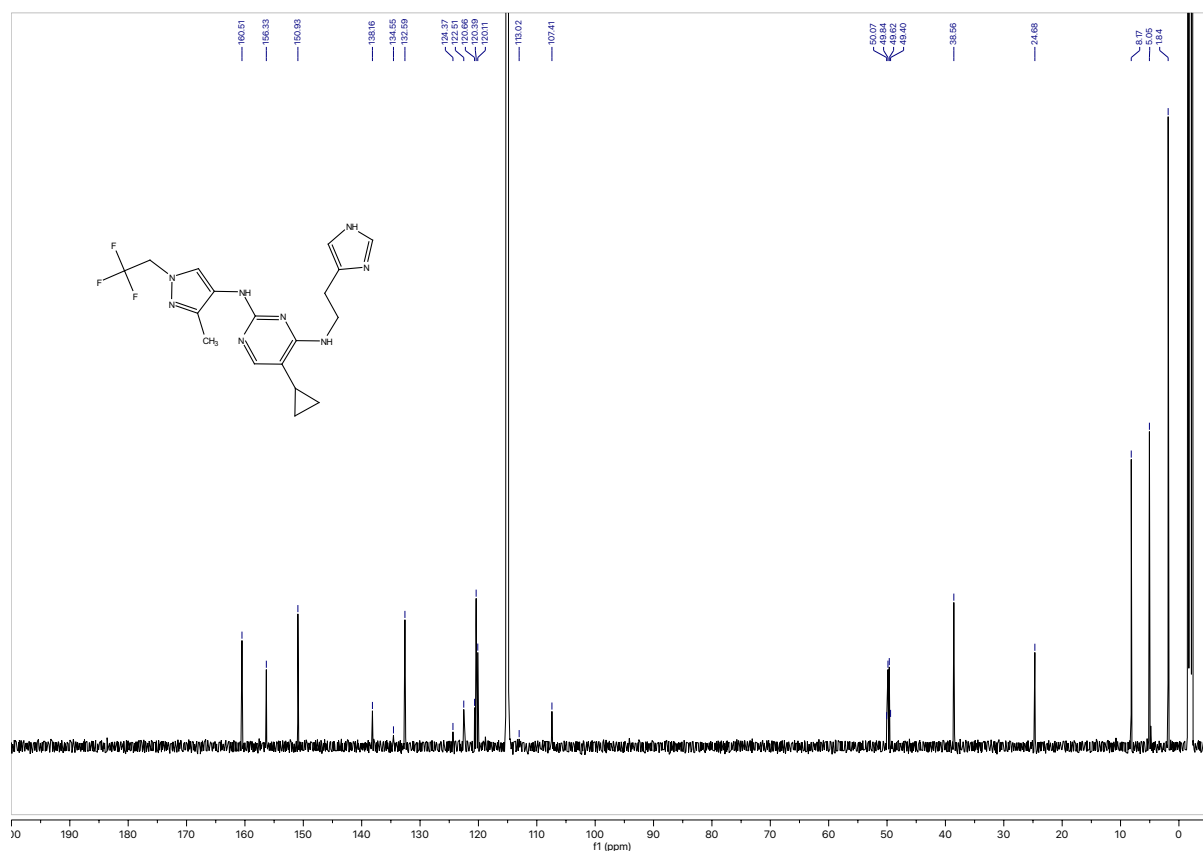

**<sup>1</sup>H NMR of N-(3-((5-cyclopropyl-2-((3-methyl-1-(2,2,2-trifluoroethyl)-1H-pyrazol-4-yl)amino)pyrimidin-4-yl)amino)propyl)cyclobutanecarboxamide (4)**

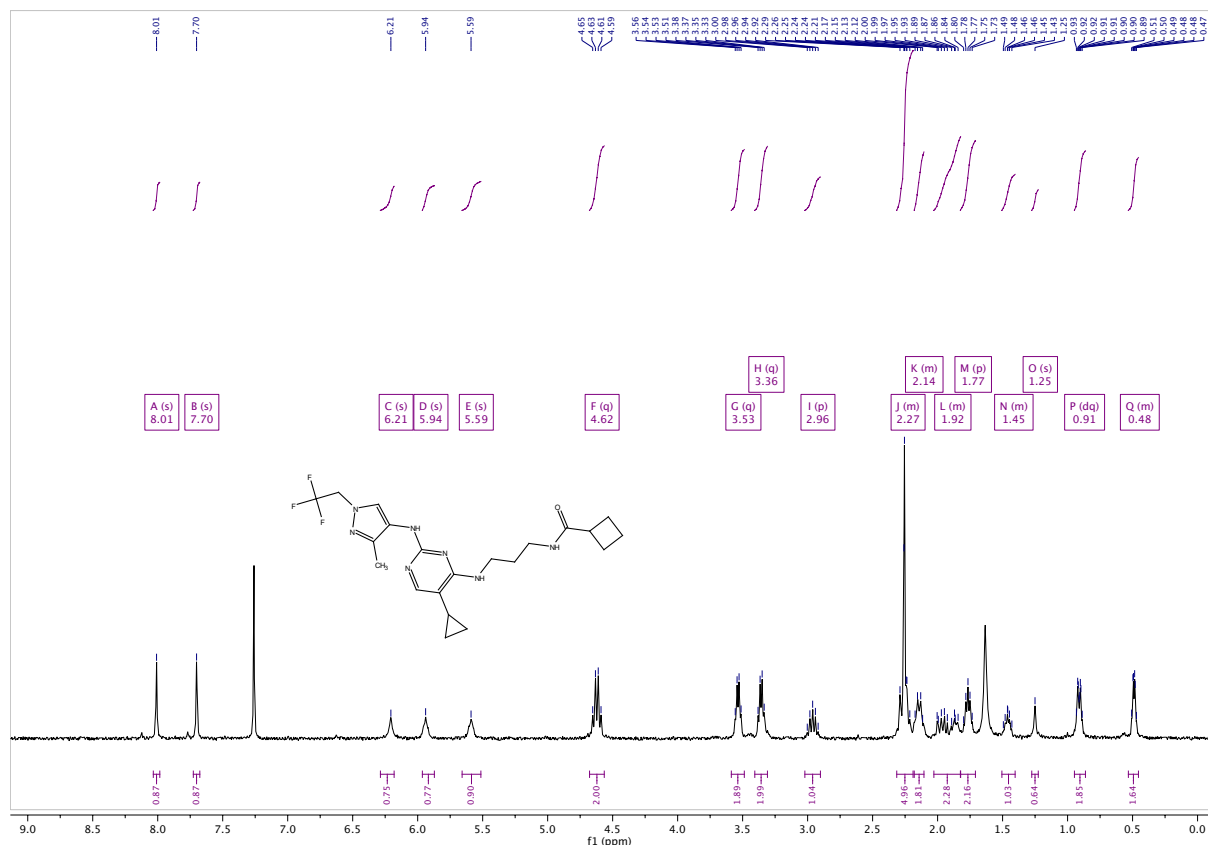

**<sup>13</sup>C NMR of N-(3-((5-cyclopropyl-2-((3-methyl-1-(2,2,2-trifluoroethyl)-1H-pyrazol-4-yl)amino)pyrimidin-4-yl)amino)propyl)cyclobutanecarboxamide (4)**

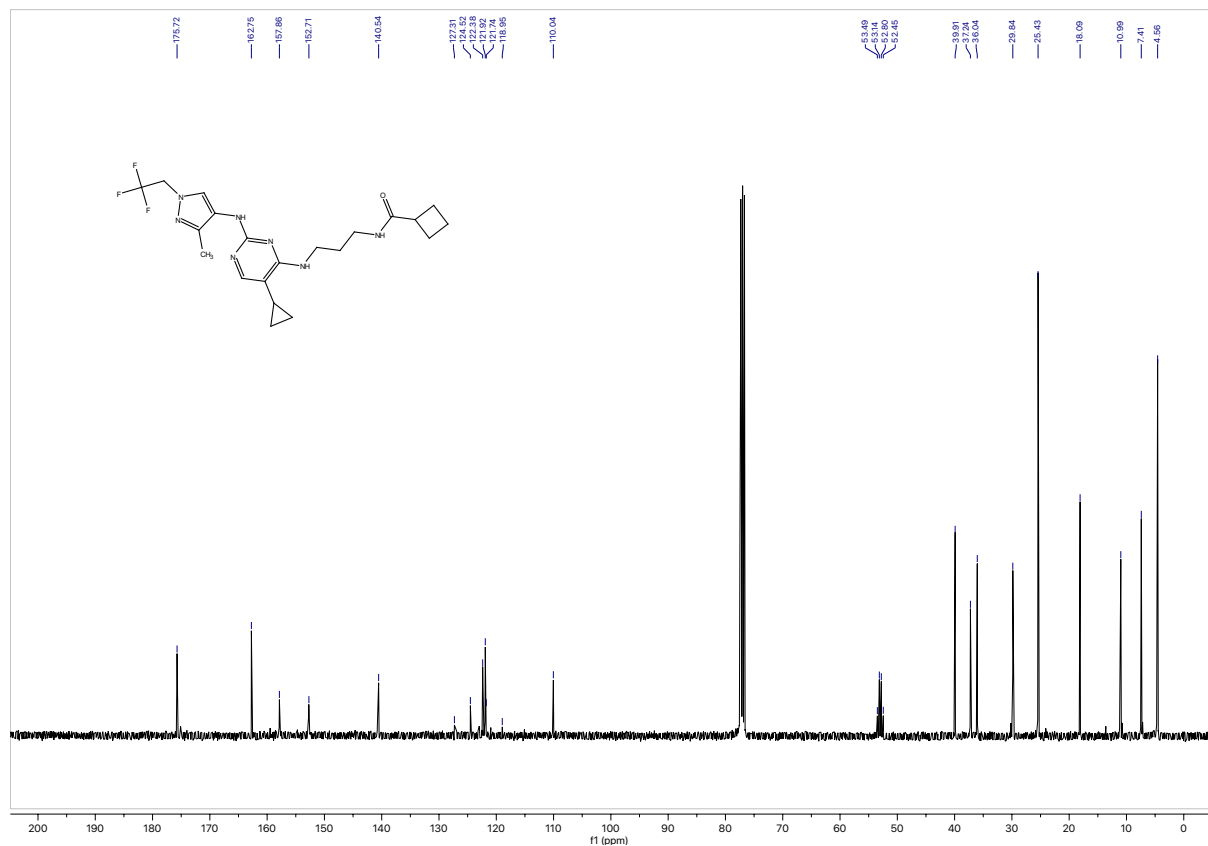

**<sup>1</sup>H NMR of 4-(((5-cyclopropyl-2-((3-methyl-1-(2,2,2-trifluoroethyl)-1H-pyrazol-4-yl)amino)pyrimidin-4-yl)amino)methyl)benzenesulfonamide (5)**

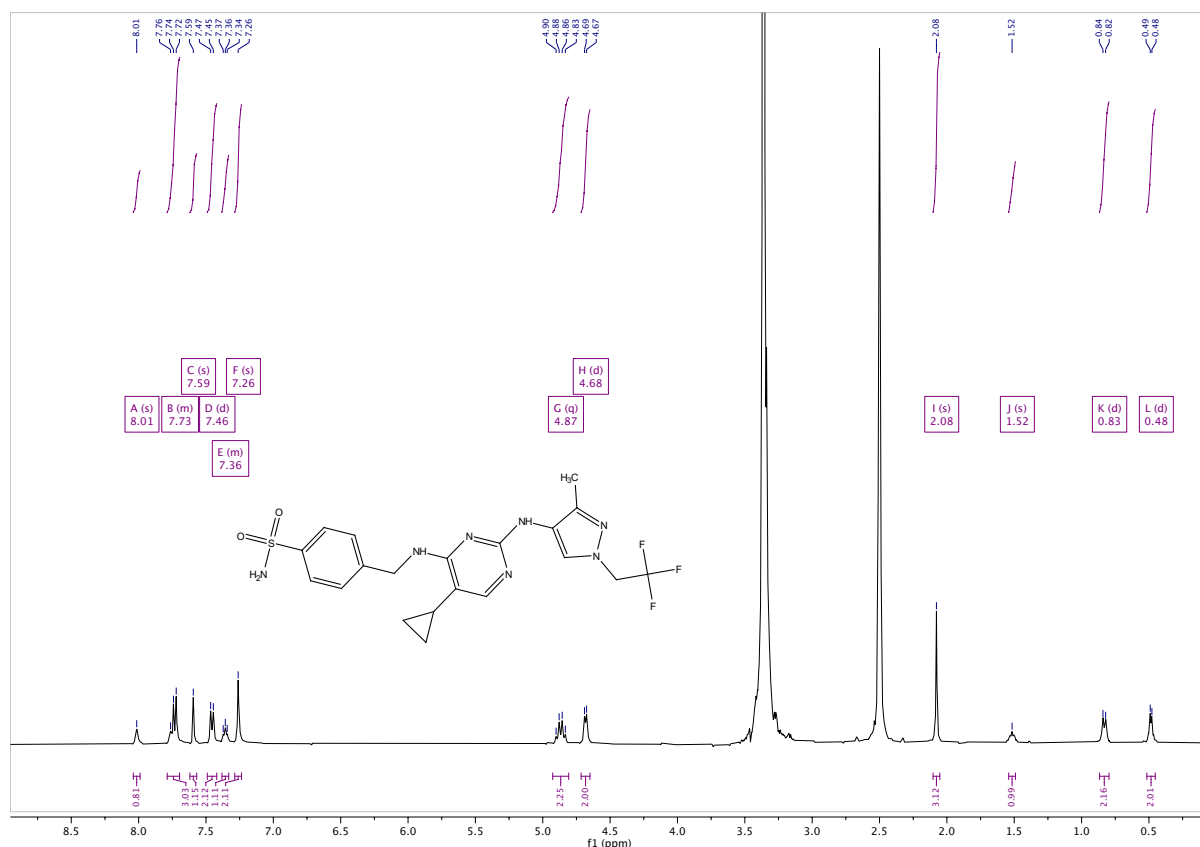

**<sup>13</sup>C NMR of 4-(((5-cyclopropyl-2-((3-methyl-1-(2,2,2-trifluoroethyl)-1H-pyrazol-4-yl)amino)pyrimidin-4-yl)amino)methyl)benzenesulfonamide (5)**

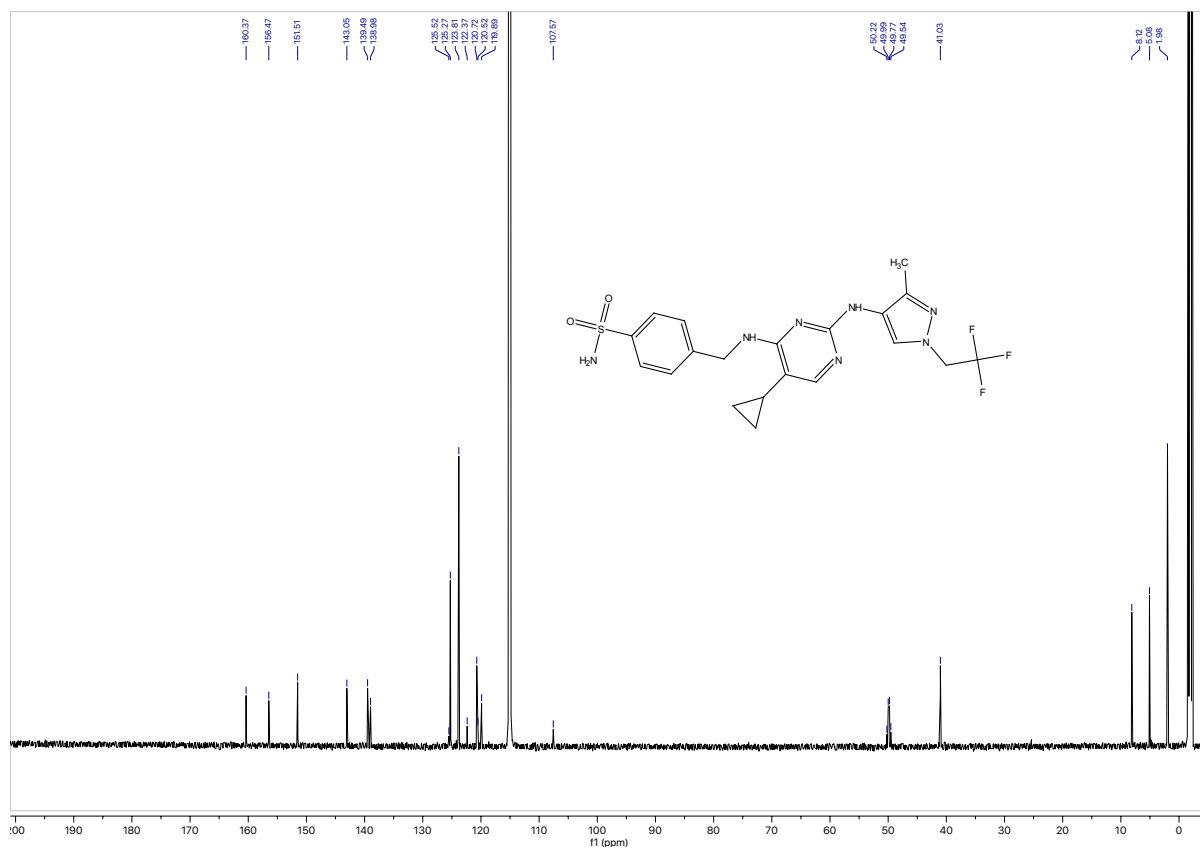

**<sup>1</sup>H NMR of 4-(((5-bromo-2-((3-(morpholinomethyl)phenyl)amino)pyrimidin-4-yl)amino)methyl)benzenesulfonamide (6)**

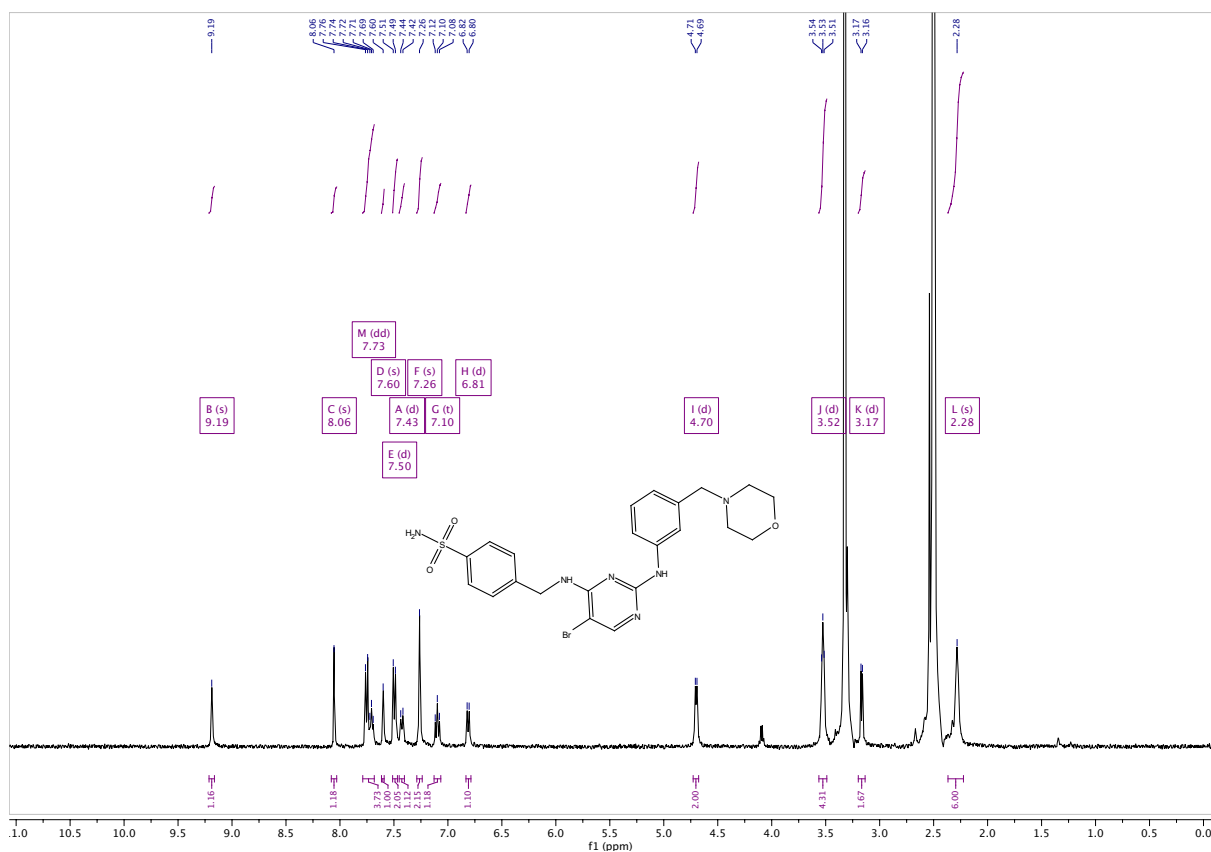

**<sup>13</sup>C NMR of 4-(((5-bromo-2-((3-(morpholinomethyl)phenyl)amino)pyrimidin-4-yl)amino)methyl)benzenesulfonamide (6)**

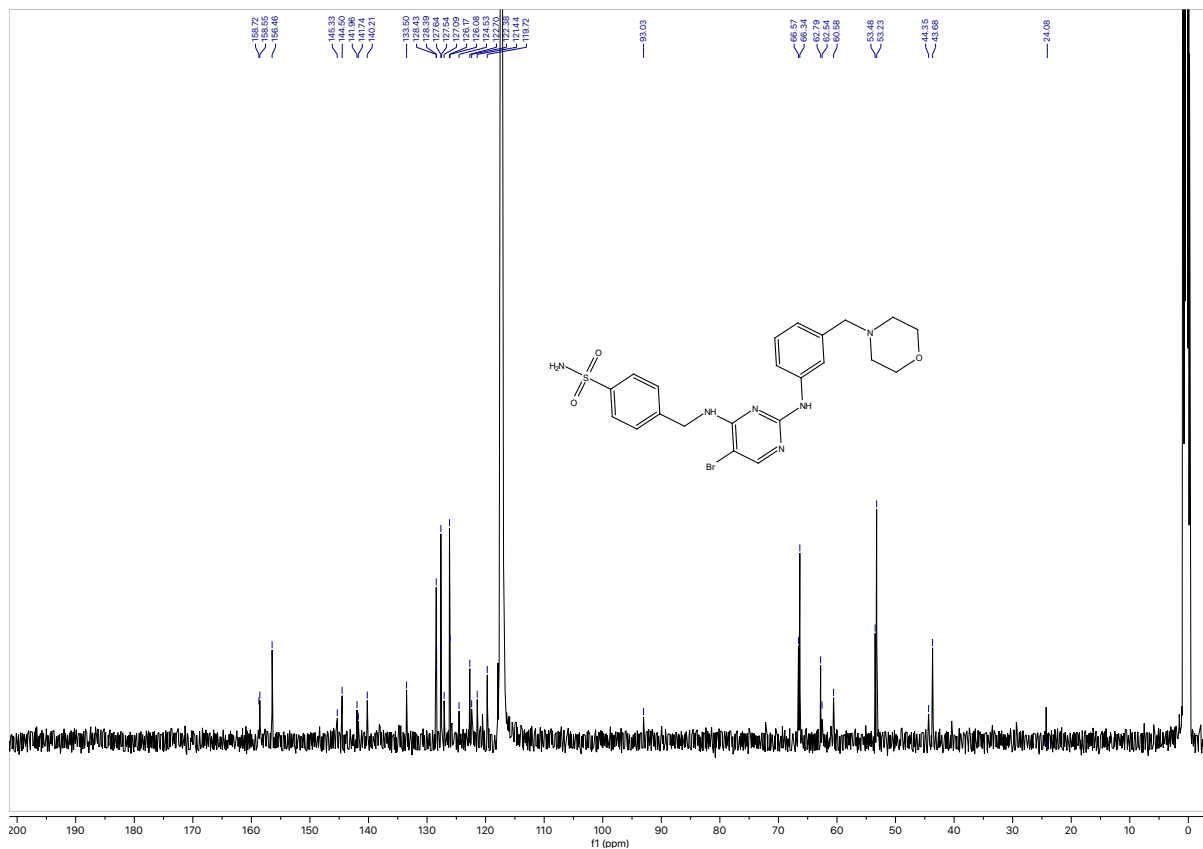

**<sup>1</sup>H NMR of N-(3-((5-bromo-2-((3-methyl-1-(2,2,2-trifluoroethyl)-1H-pyrazol-4-yl)amino)pyrimidin-4-yl)amino)propyl)cyclobutanecarboxamide (7)**

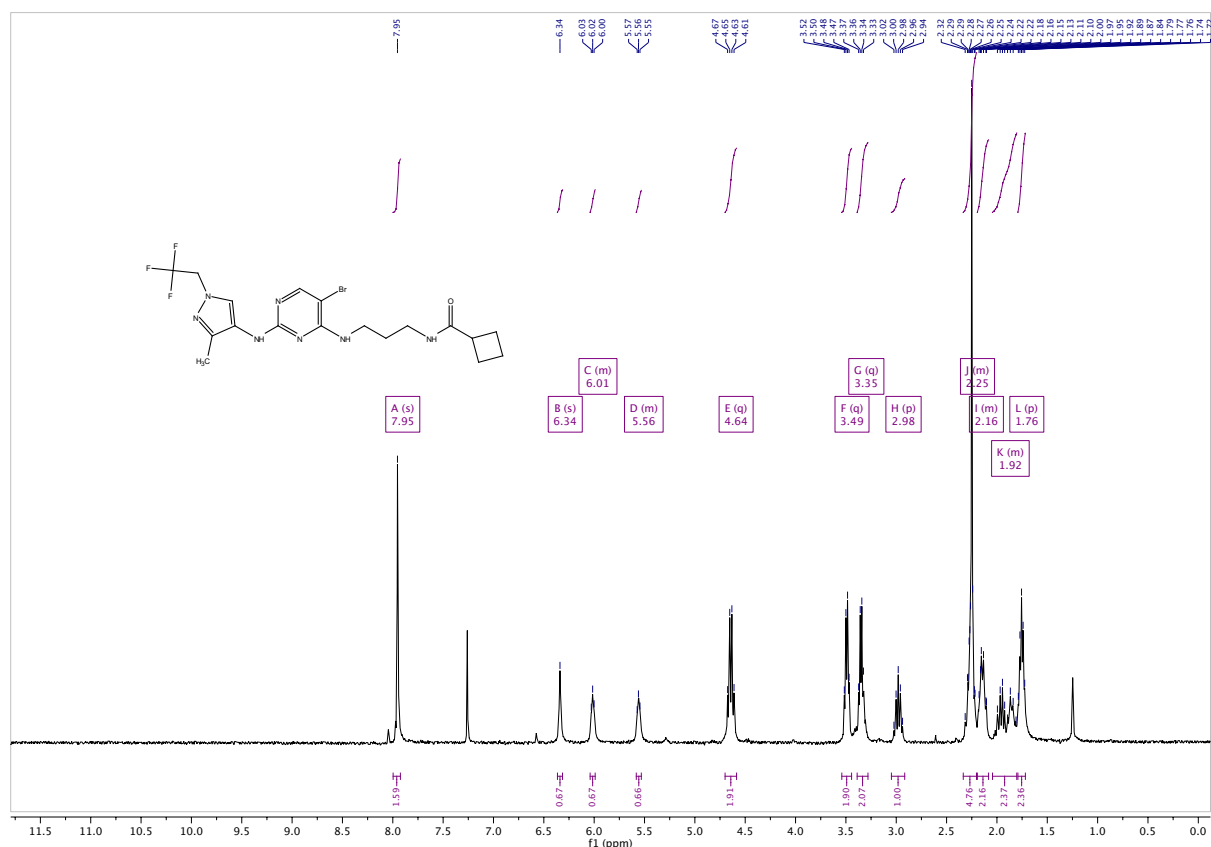

**<sup>13</sup>C NMR of N-(3-((5-bromo-2-((3-methyl-1-(2,2,2-trifluoroethyl)-1H-pyrazol-4-yl)amino)pyrimidin-4-yl)amino)propyl)cyclobutanecarboxamide (7)**

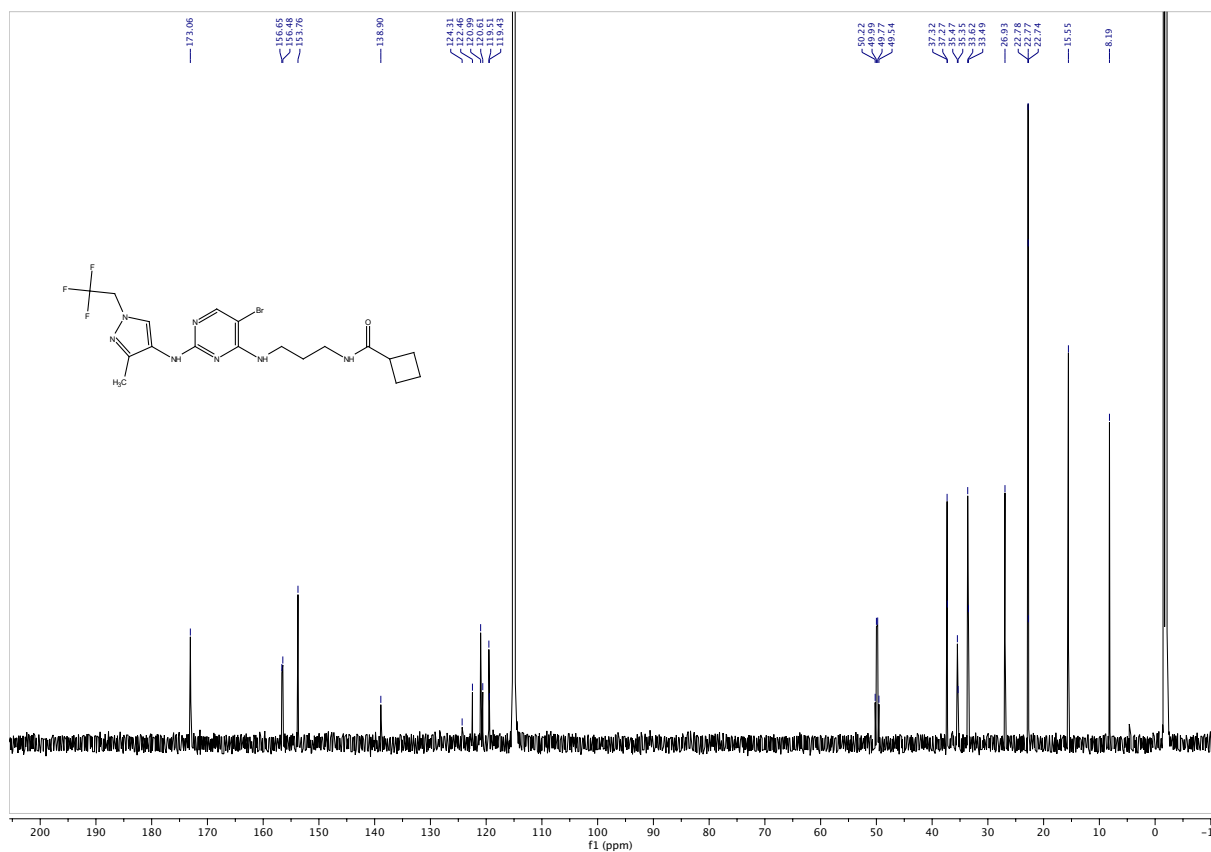



**$^1\text{H}$  NMR of N-(3-((2-((3-methyl-1-(2,2,2-trifluoroethyl)-1H-pyrazol-4-yl)amino)pyrimidin-4-yl)amino)-propyl)cyclobutanecarboxamide (8)**

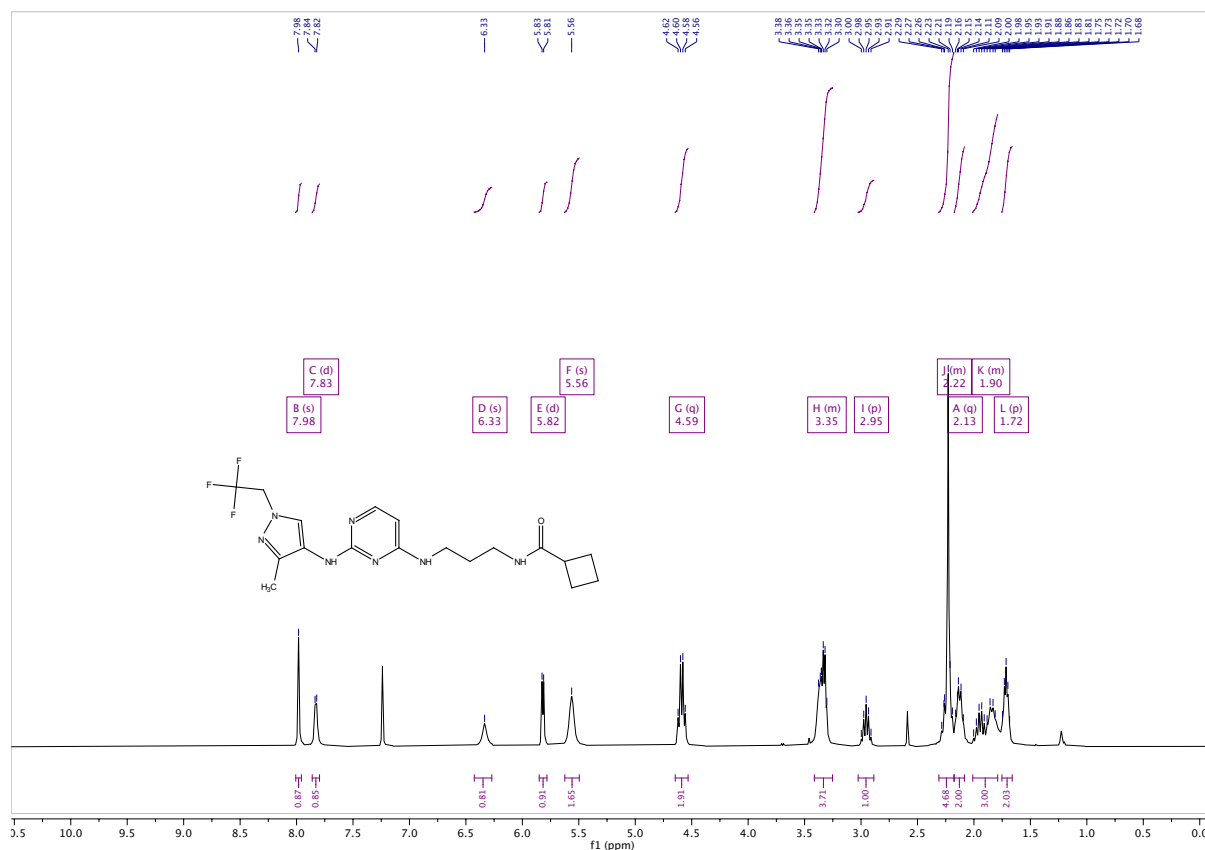

**$^{13}\text{C}$  NMR of N-(3-((2-((3-methyl-1-(2,2,2-trifluoroethyl)-1H-pyrazol-4-yl)amino)pyrimidin-4-yl)amino)-propyl)cyclobutanecarboxamide (8)**

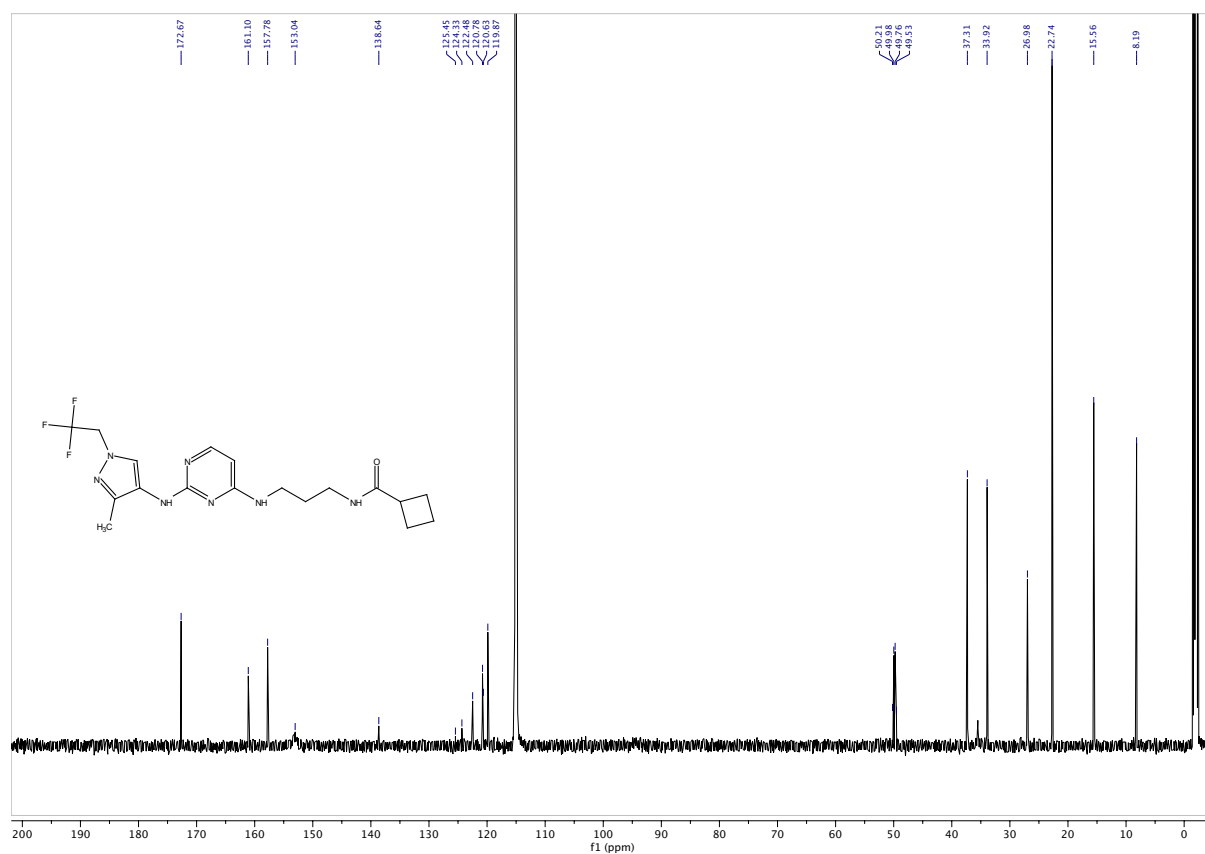

**<sup>1</sup>H NMR of N<sup>4</sup>-(2-(1H-imidazol-4-yl)ethyl)-5-bromo-N<sup>2</sup>-(3-(morpholinomethyl)phenyl)pyrimidine-2,4-diamine (9)**

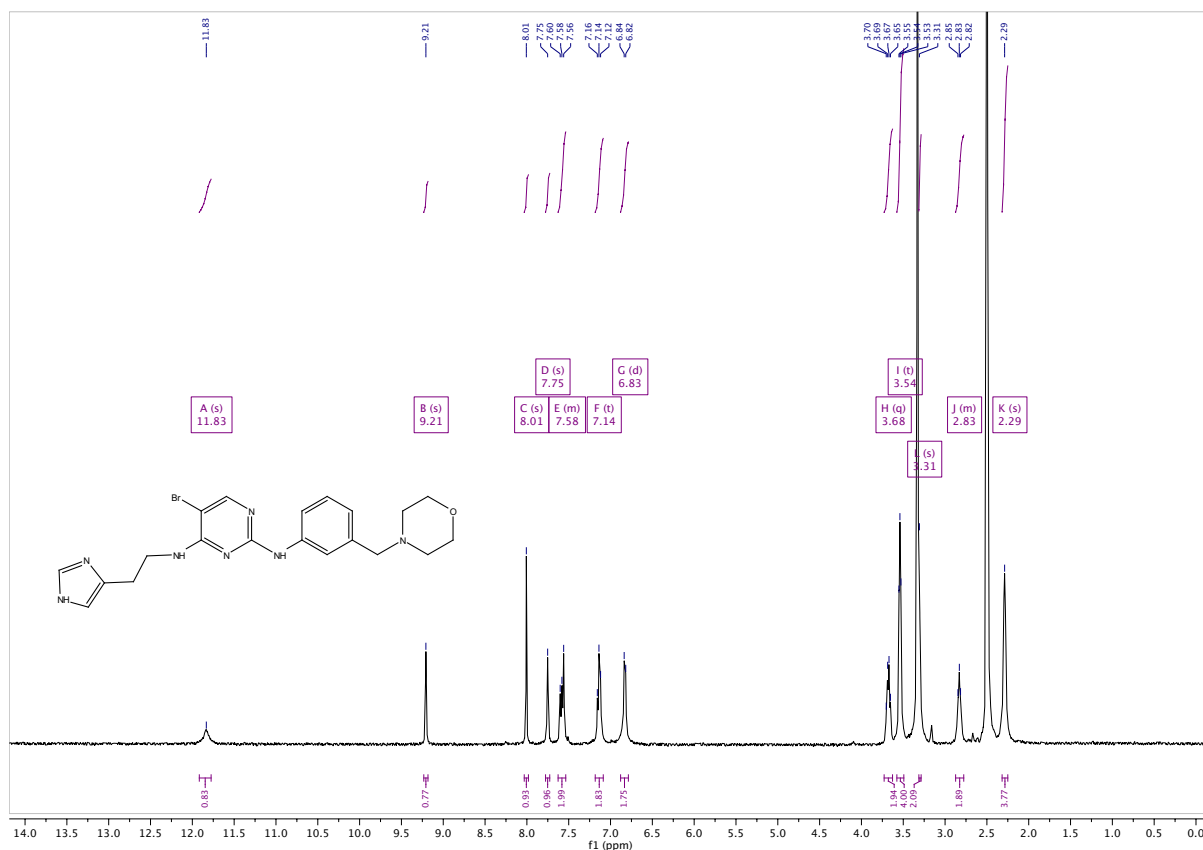

**<sup>13</sup>C NMR of N<sup>4</sup>-(2-(1H-imidazol-4-yl)ethyl)-5-bromo-N<sup>2</sup>-(3-(morpholinomethyl)phenyl)pyrimidine-2,4-diamine (9)**

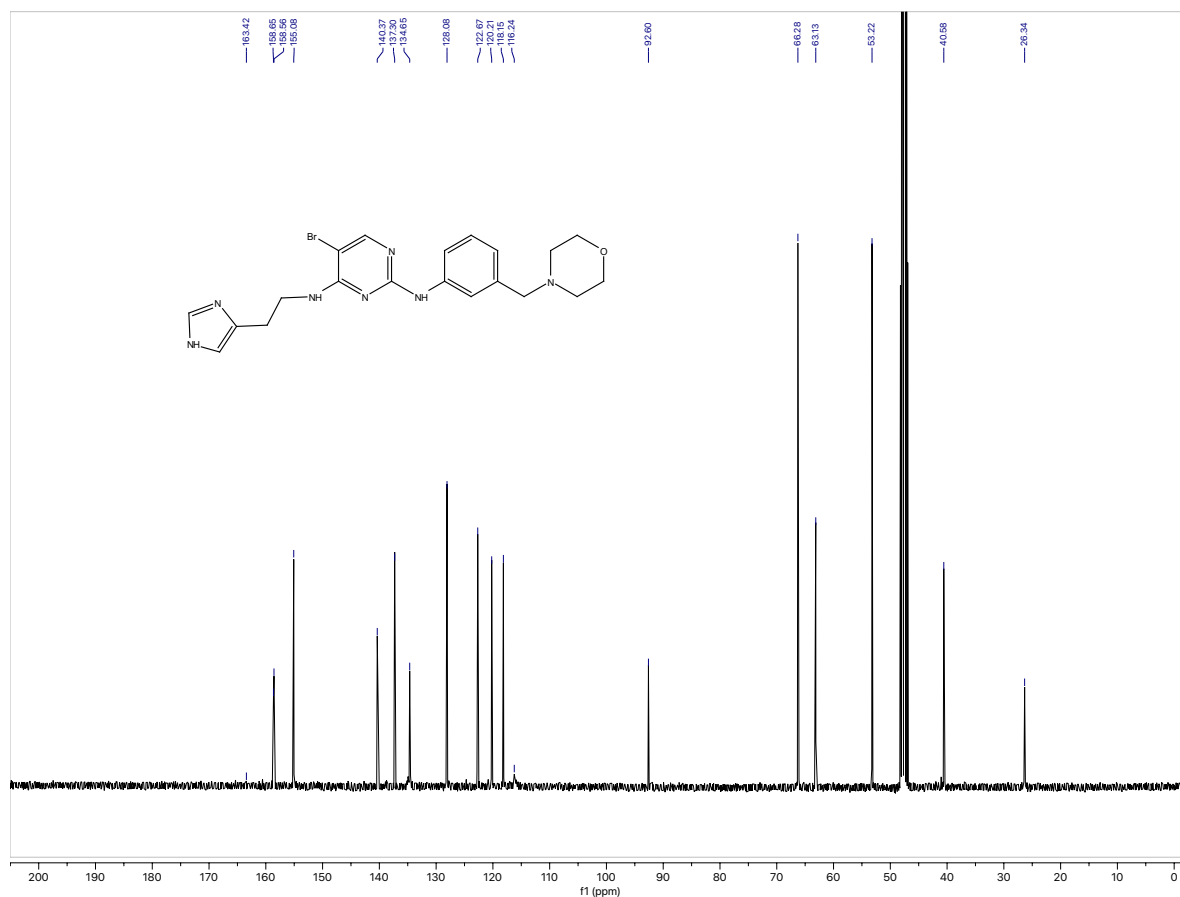

**$^1\text{H}$  NMR of  $\text{N}^4$ -(2-(1H-imidazol-5-yl)ethyl)-5-bromo- $\text{N}^2$ -(3-methyl-1-(2,2,2-trifluoroethyl)-1H-pyrazol-4-yl)pyrimidine-2,4-diamine (10)**

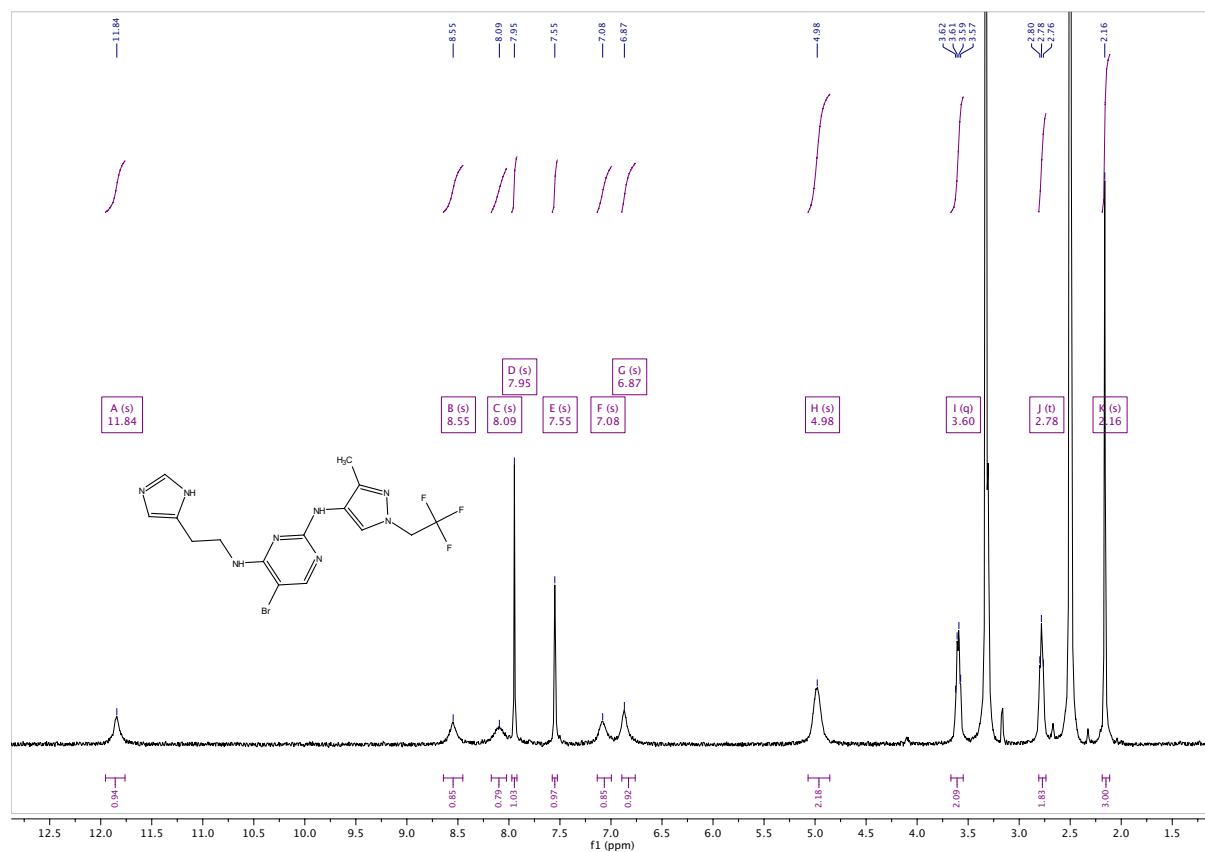

**$^{13}\text{C}$  NMR of  $\text{N}^4$ -(2-(1H-imidazol-5-yl)ethyl)-5-bromo- $\text{N}^2$ -(3-methyl-1-(2,2,2-trifluoroethyl)-1H-pyrazol-4-yl)pyrimidine-2,4-diamine (10)**

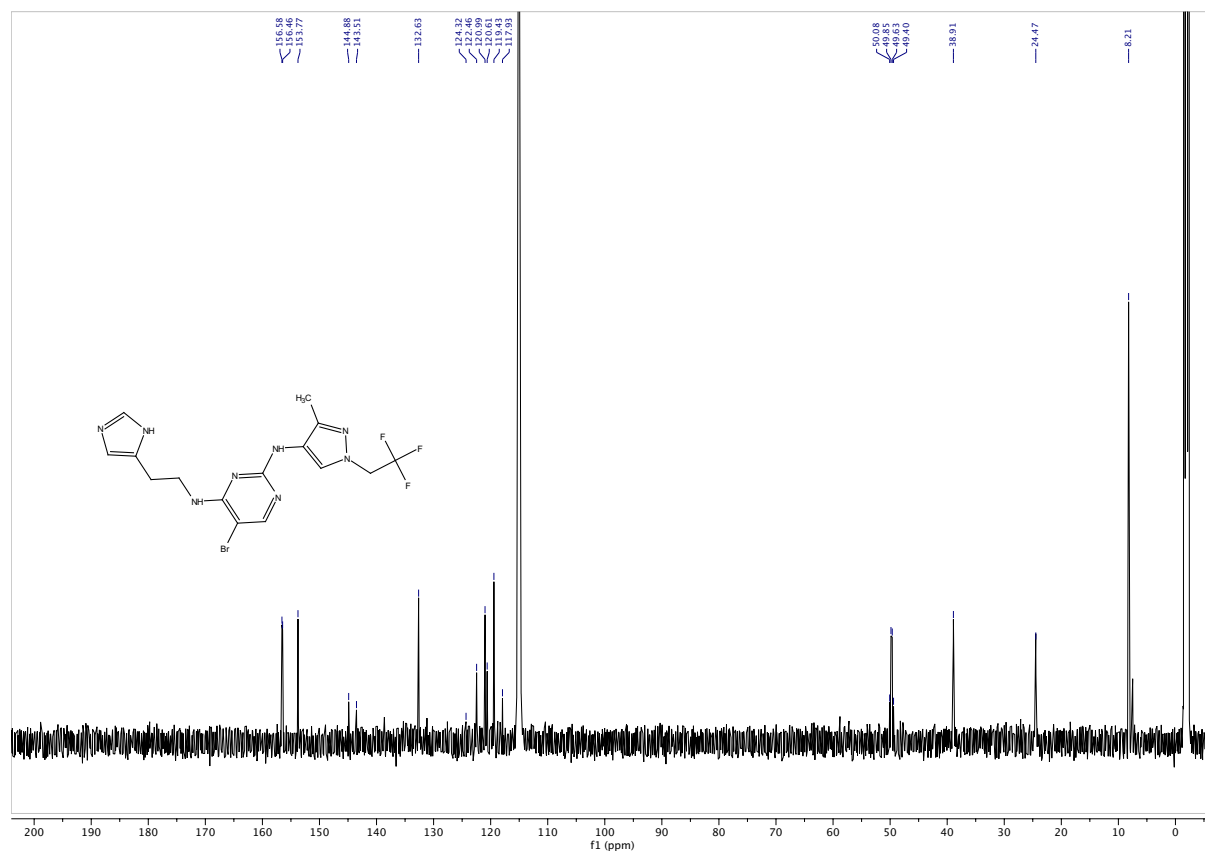

**<sup>1</sup>H NMR of 4-(((5-cyclopropyl-2-((3-(morpholinomethyl)phenyl)amino)pyrimidin-4-yl)amino)methyl)benzenesulfonamide (11)**

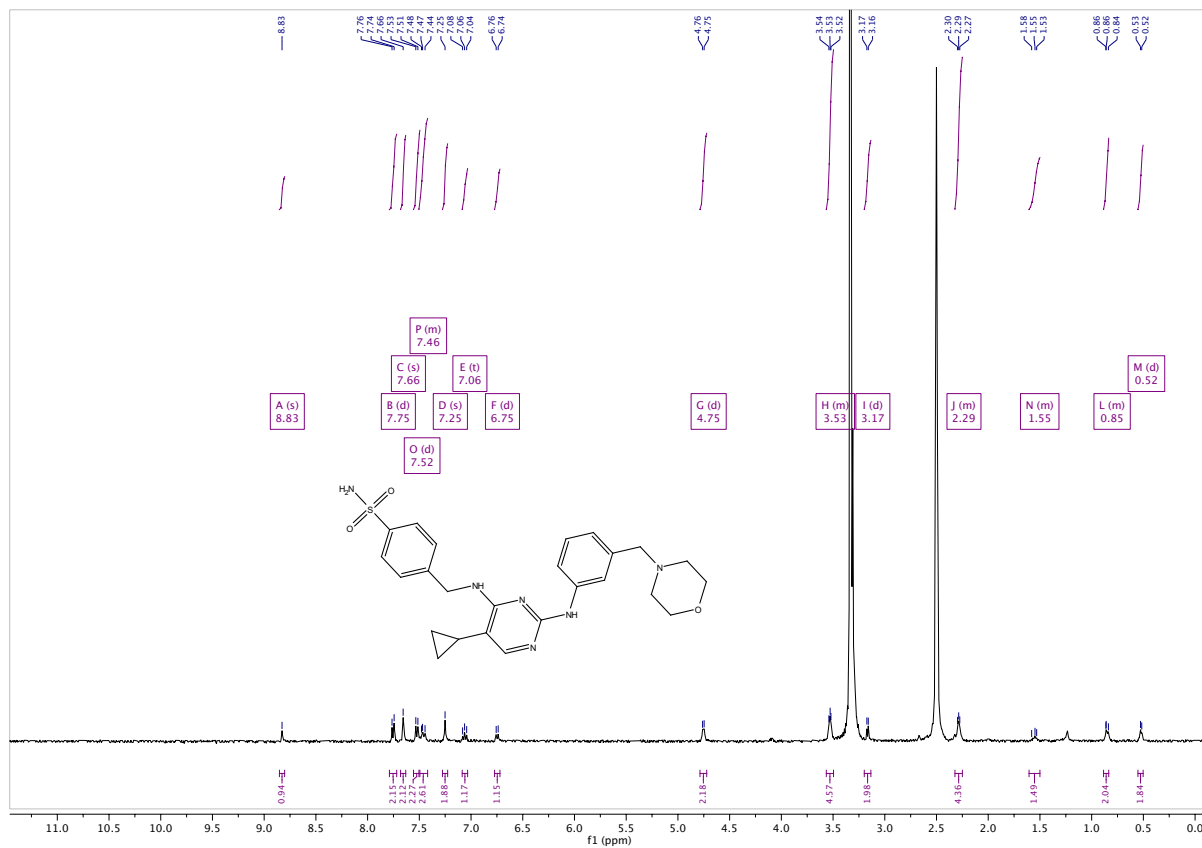

**<sup>13</sup>C NMR of 4-(((5-cyclopropyl-2-((3-(morpholinomethyl)phenyl)amino)pyrimidin-4-yl)amino)methyl)benzenesulfonamide (11)**

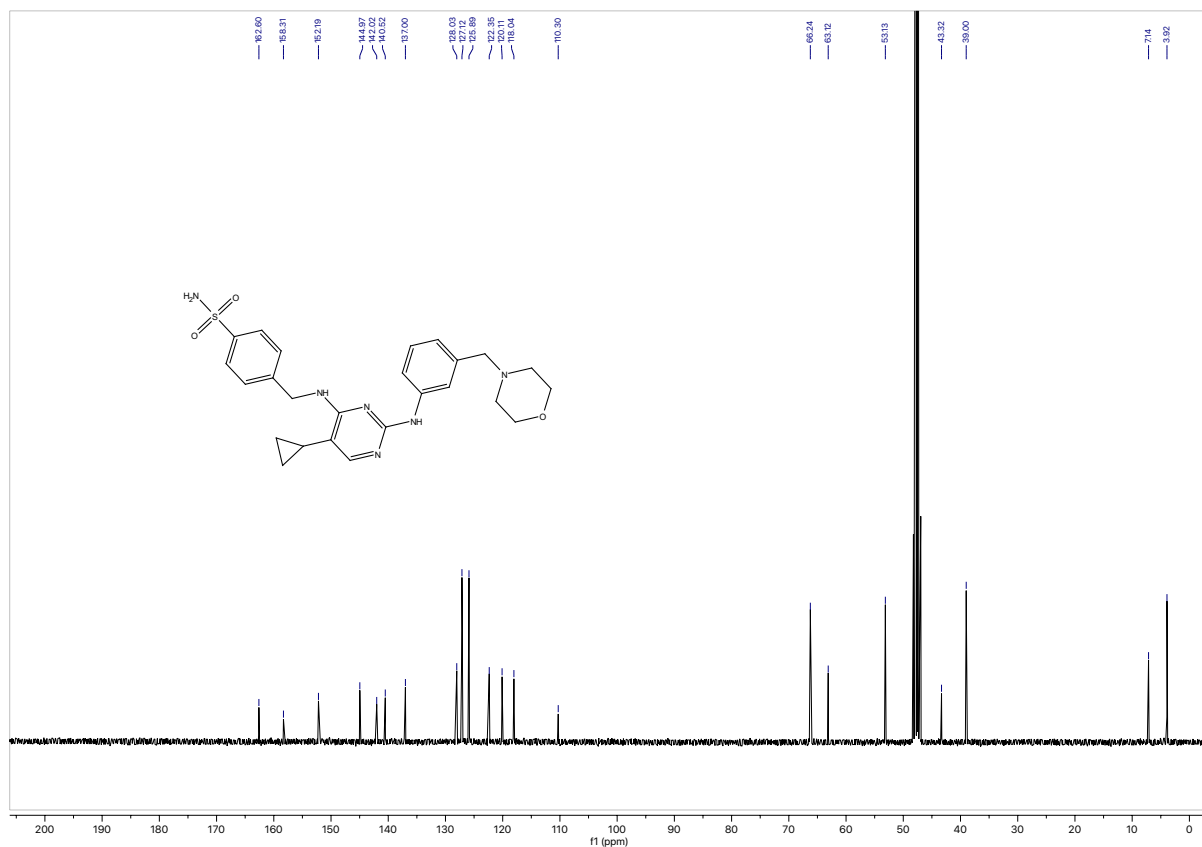

**<sup>1</sup>H NMR of 4-(((2-((3-methyl-1-(2,2,2-trifluoroethyl)-1H-pyrazol-4-yl)amino)pyrimidin-4-yl)amino)methyl)benzenesulfonamide (12)**

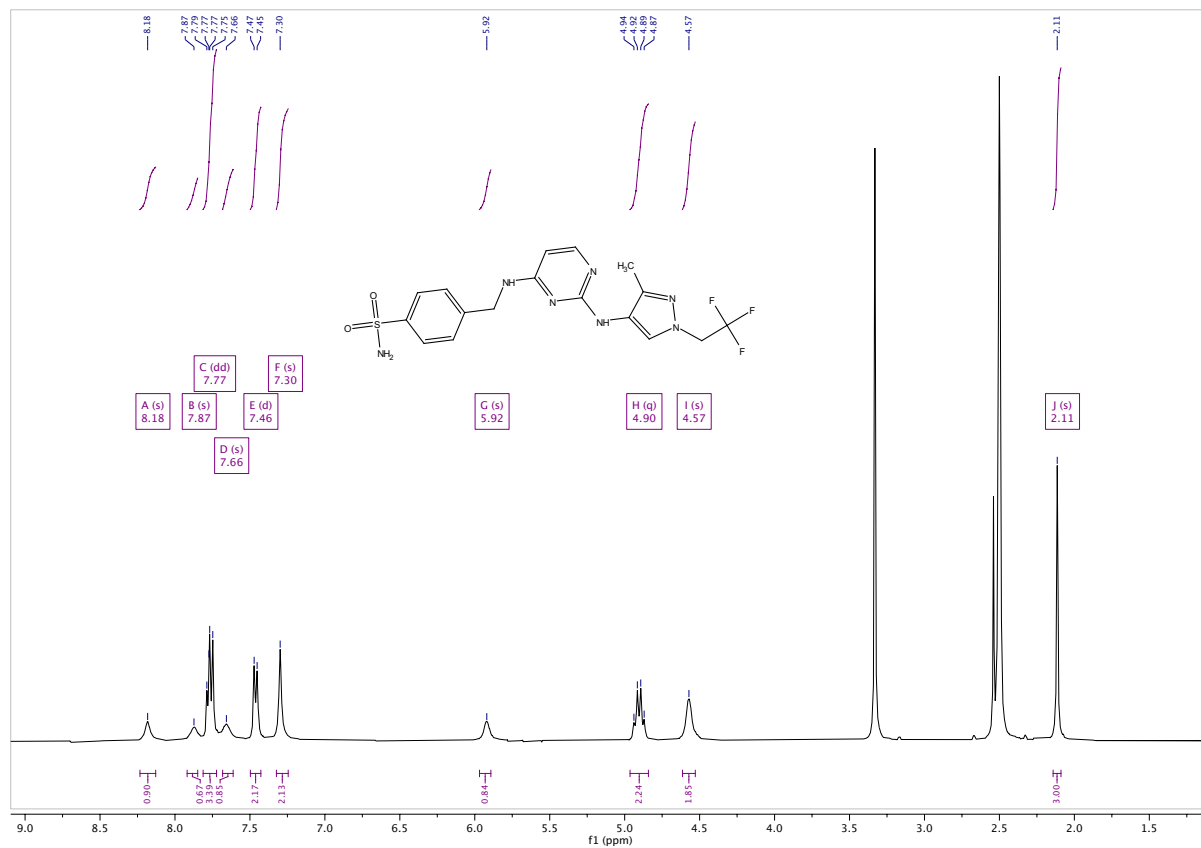

**<sup>13</sup>C NMR of 4-(((2-((3-methyl-1-(2,2,2-trifluoroethyl)-1H-pyrazol-4-yl)amino)pyrimidin-4-yl)amino)methyl)benzenesulfonamide (12)**

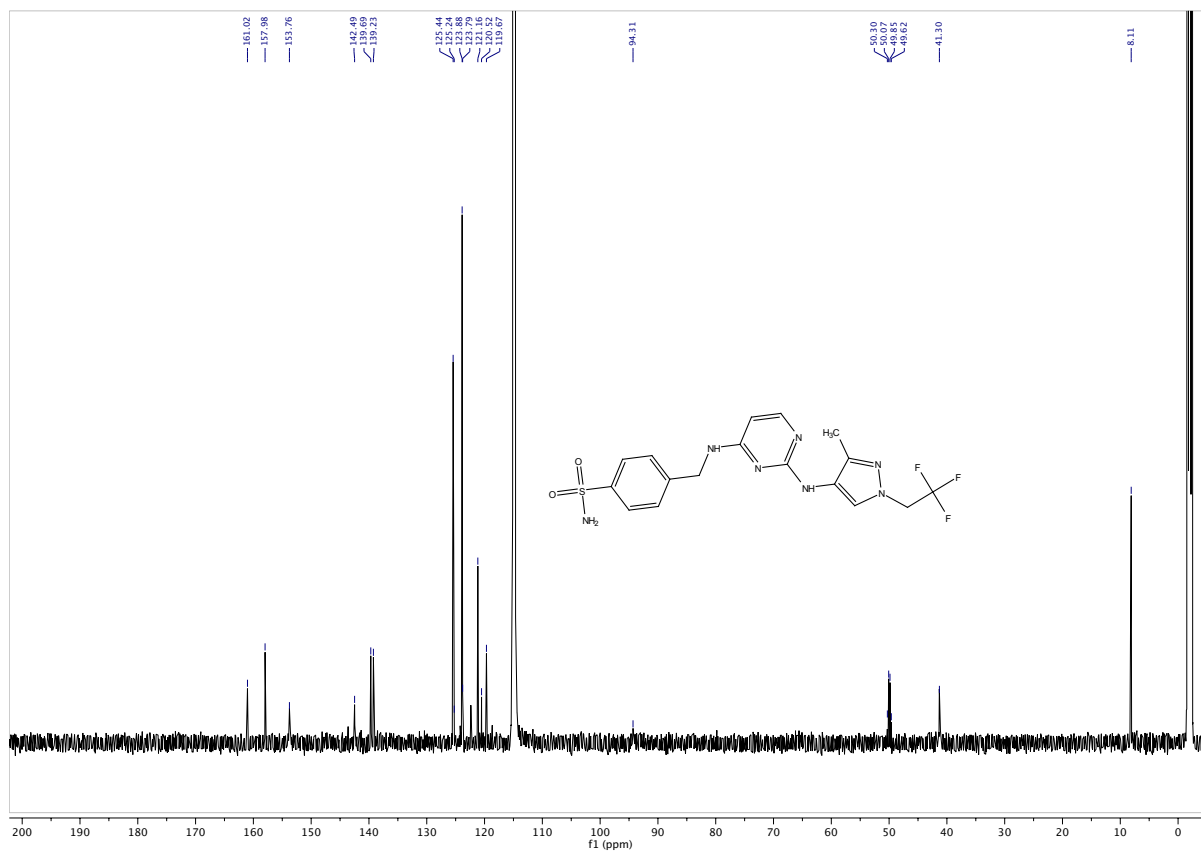

**<sup>1</sup>H NMR of N-(3-((5-bromo-4-((4-sulfamoylbenzyl)amino)pyrimidin-2-yl)amino)phenyl)pyrrolidine-1-carboxamide (13)**

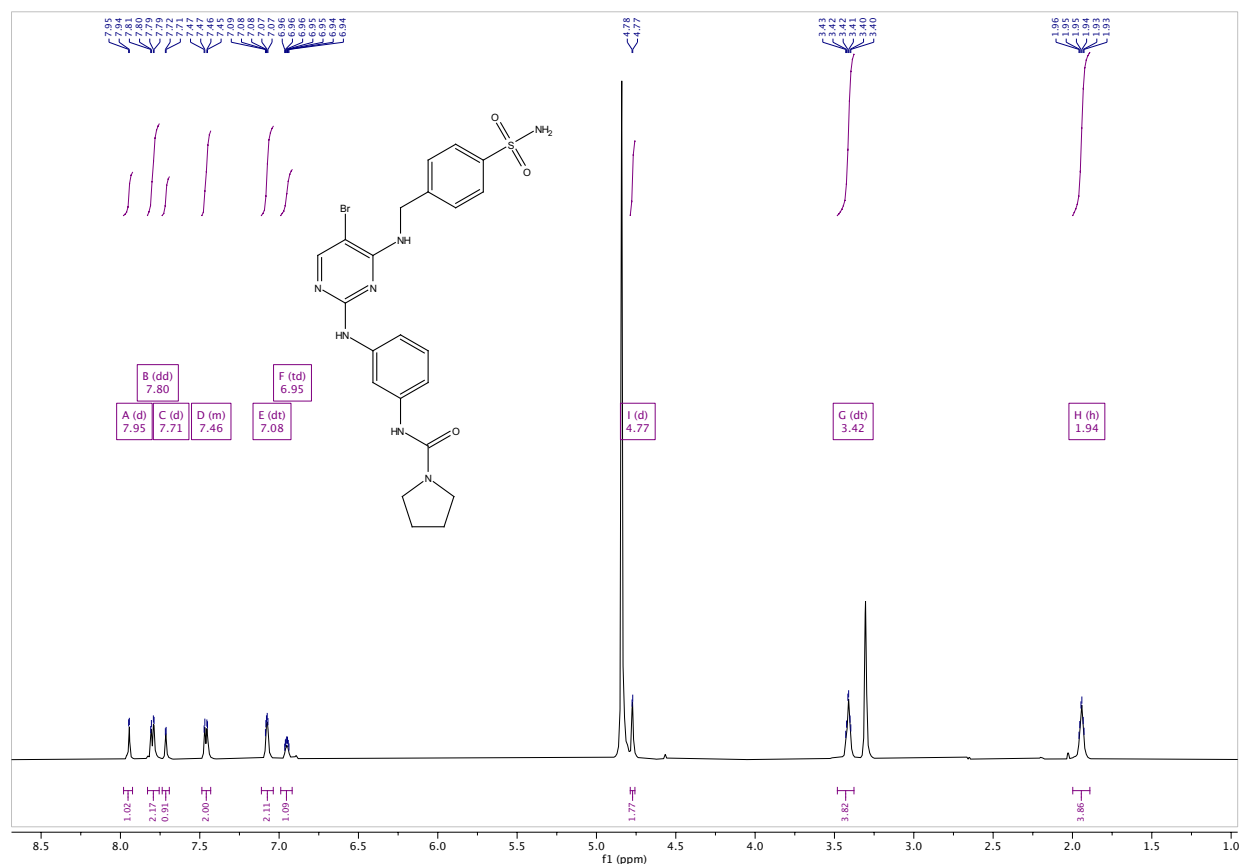

**<sup>13</sup>C NMR of N-(3-((5-bromo-4-((4-sulfamoylbenzyl)amino)pyrimidin-2-yl)amino)phenyl)pyrrolidine-1-carboxamide (13)**

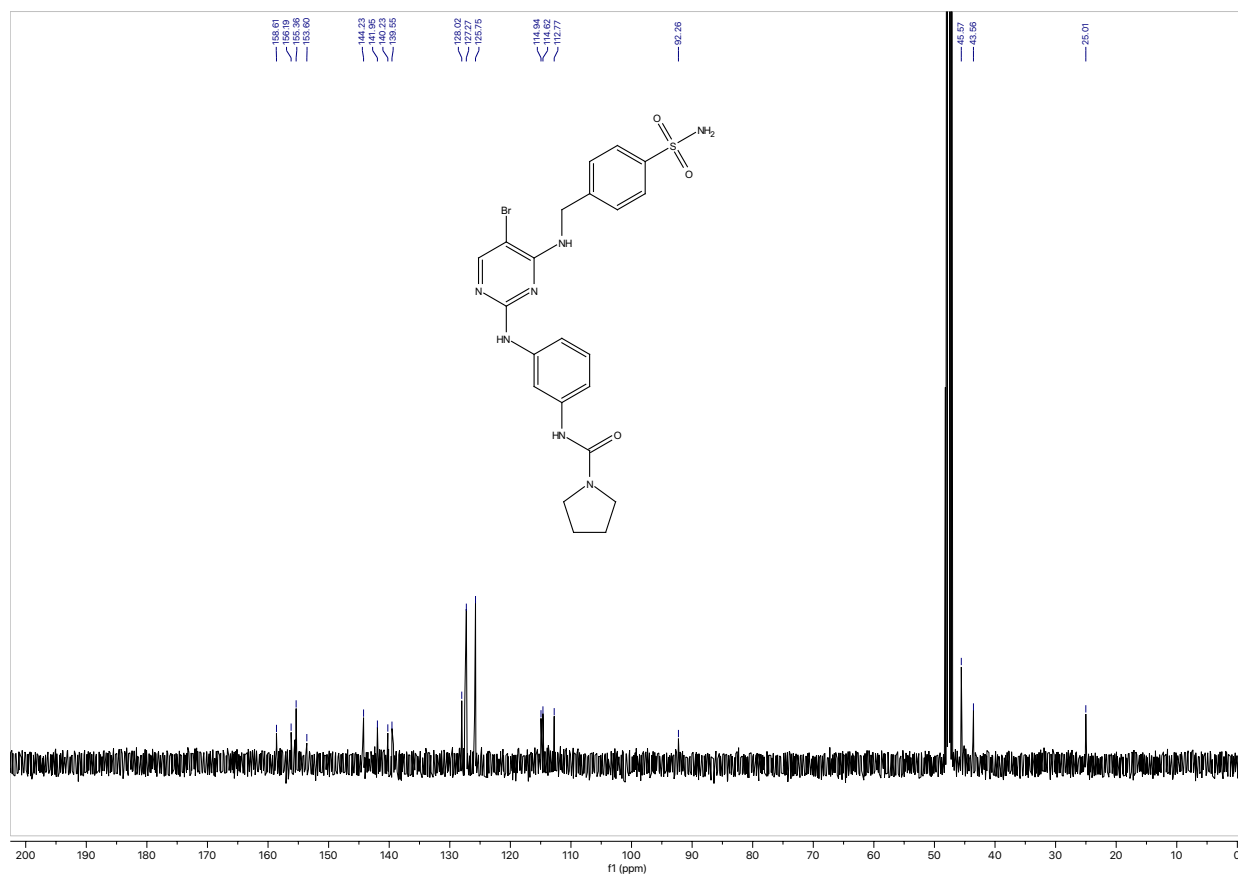

**<sup>1</sup>H NMR of N<sup>4</sup>-(2-(1H-imidazol-4-yl)ethyl)-5-cyclopropyl-N<sup>2</sup>-(3-(morpholinomethyl)phenyl)pyrimidine-2,4-diamine (14)**

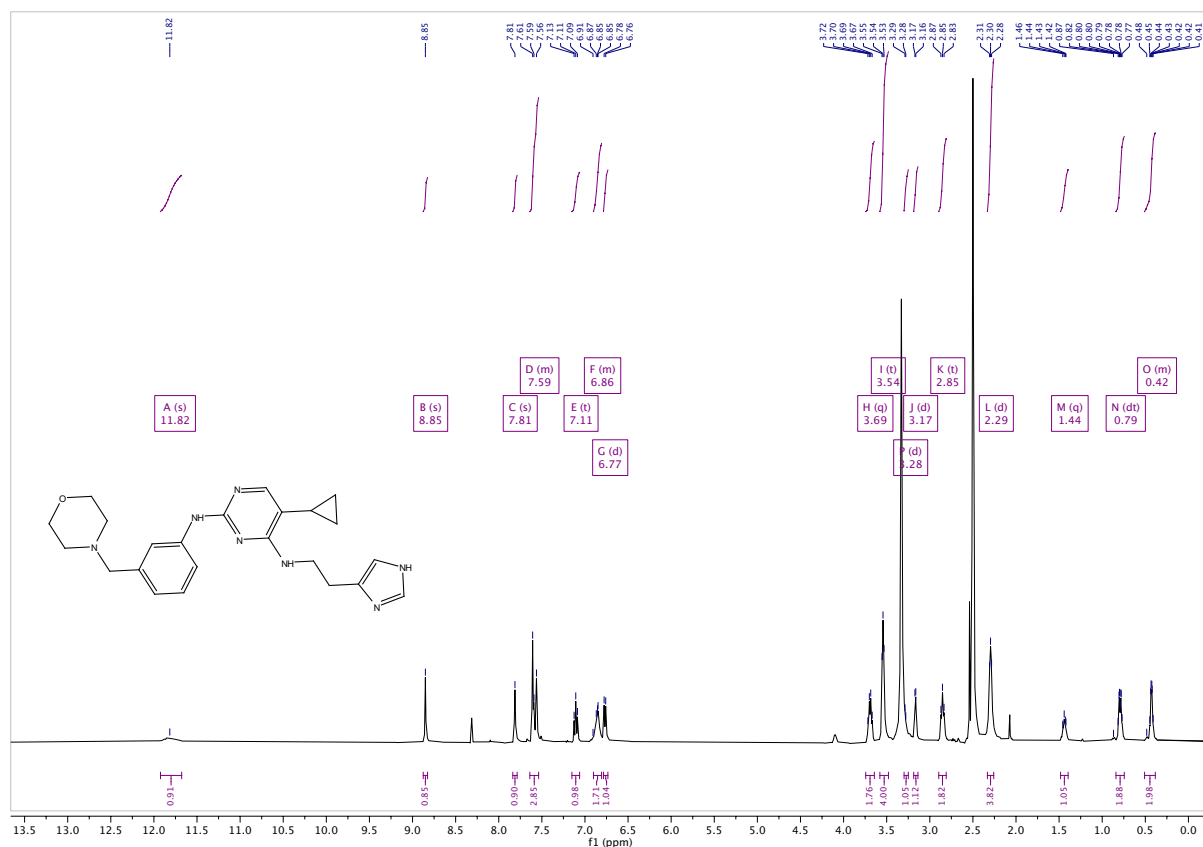

**<sup>13</sup>C NMR of N<sup>4</sup>-(2-(1H-imidazol-4-yl)ethyl)-5-cyclopropyl-N<sup>2</sup>-(3-(morpholinomethyl)phenyl)pyrimidine-2,4-diamine (14)**

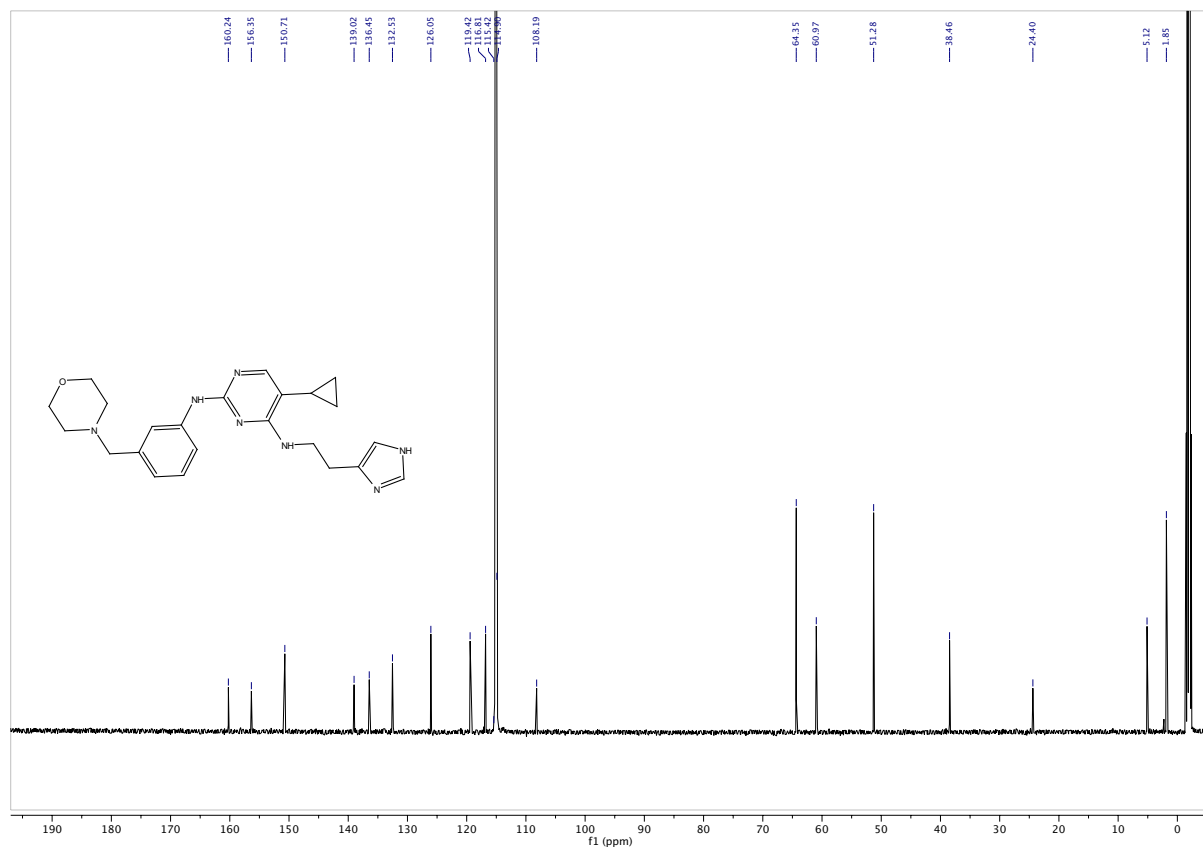

**$^1\text{H}$  NMR of  $\text{N}^4$ -(2-(1H-imidazol-5-yl)ethyl)- $\text{N}^2$ -(3-methyl-1-(2,2,2-trifluoroethyl)-1H-pyrazol-4-yl)pyrimidine-2,4-diamine (15)**

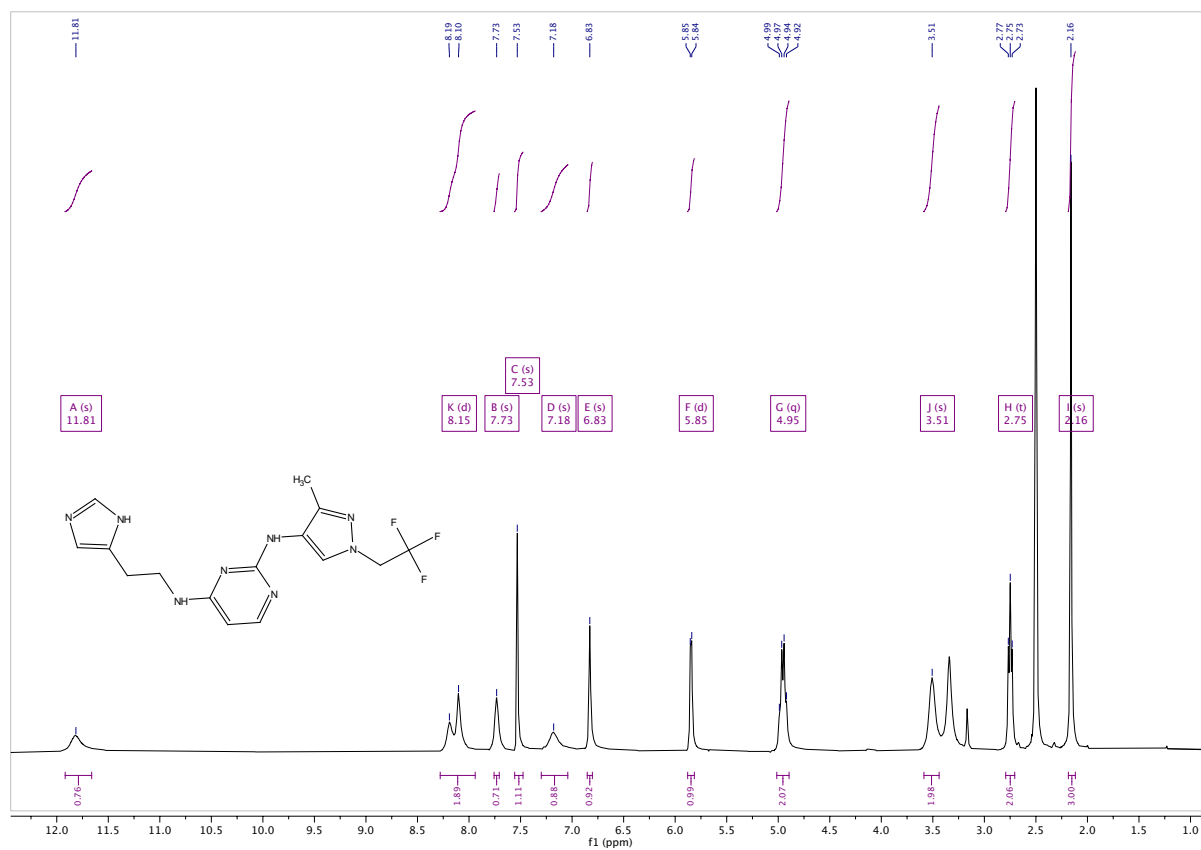

**$^{13}\text{C}$  NMR of  $\text{N}^4$ -(2-(1H-imidazol-5-yl)ethyl)- $\text{N}^2$ -(3-methyl-1-(2,2,2-trifluoroethyl)-1H-pyrazol-4-yl)pyrimidine-2,4-diamine (15)**

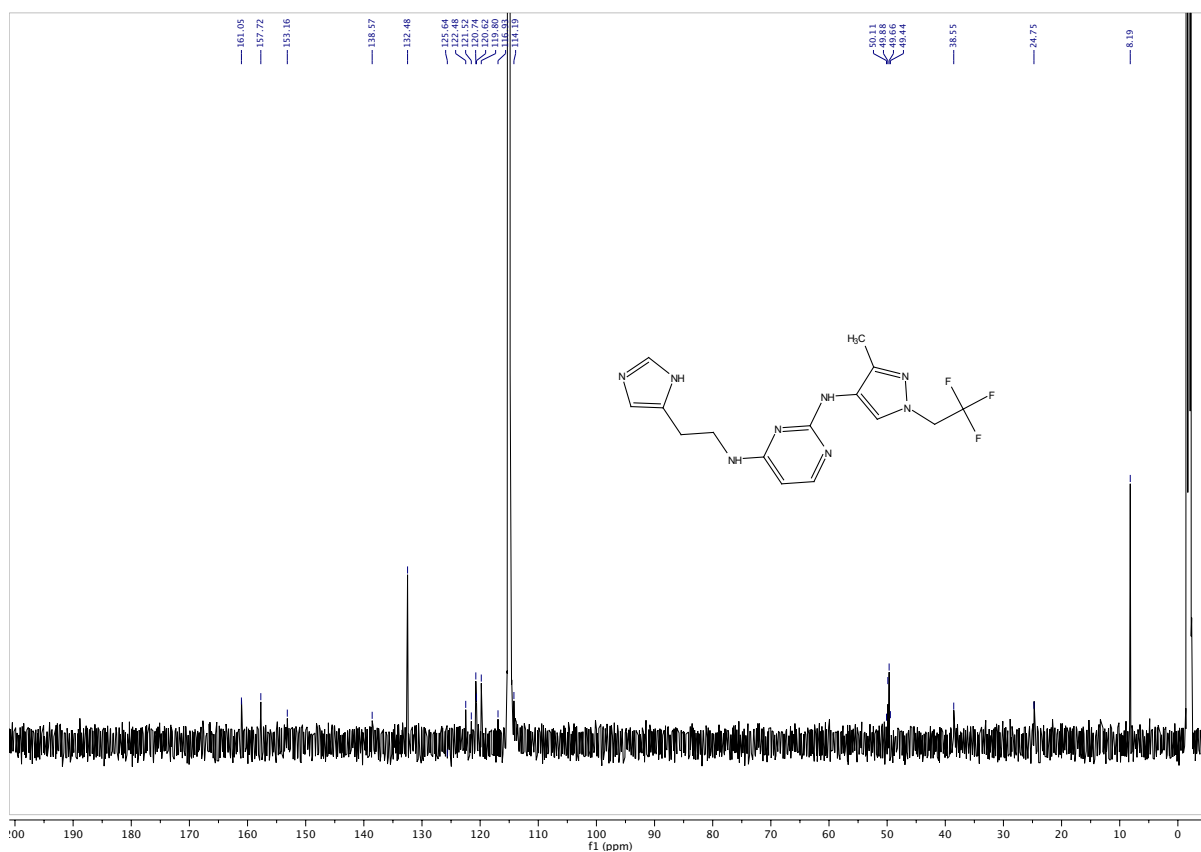



**<sup>1</sup>H NMR of N-(3-((4-((4-sulfamoylbenzyl)amino)pyrimidin-2-yl)amino)phenyl)pyrrolidine-1-carboxamide (16)**

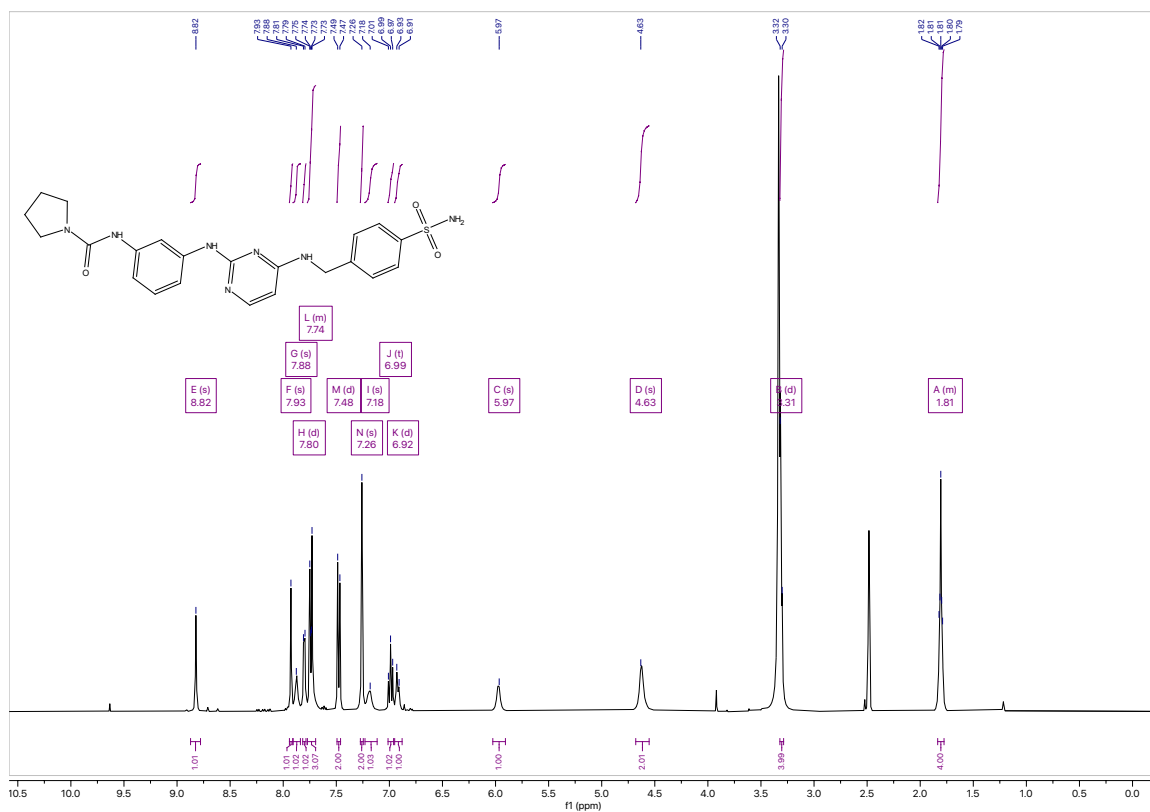

**<sup>13</sup>C NMR of N-(3-((4-((4-sulfamoylbenzyl)amino)pyrimidin-2-yl)amino)phenyl)pyrrolidine-1-carboxamide (16)**

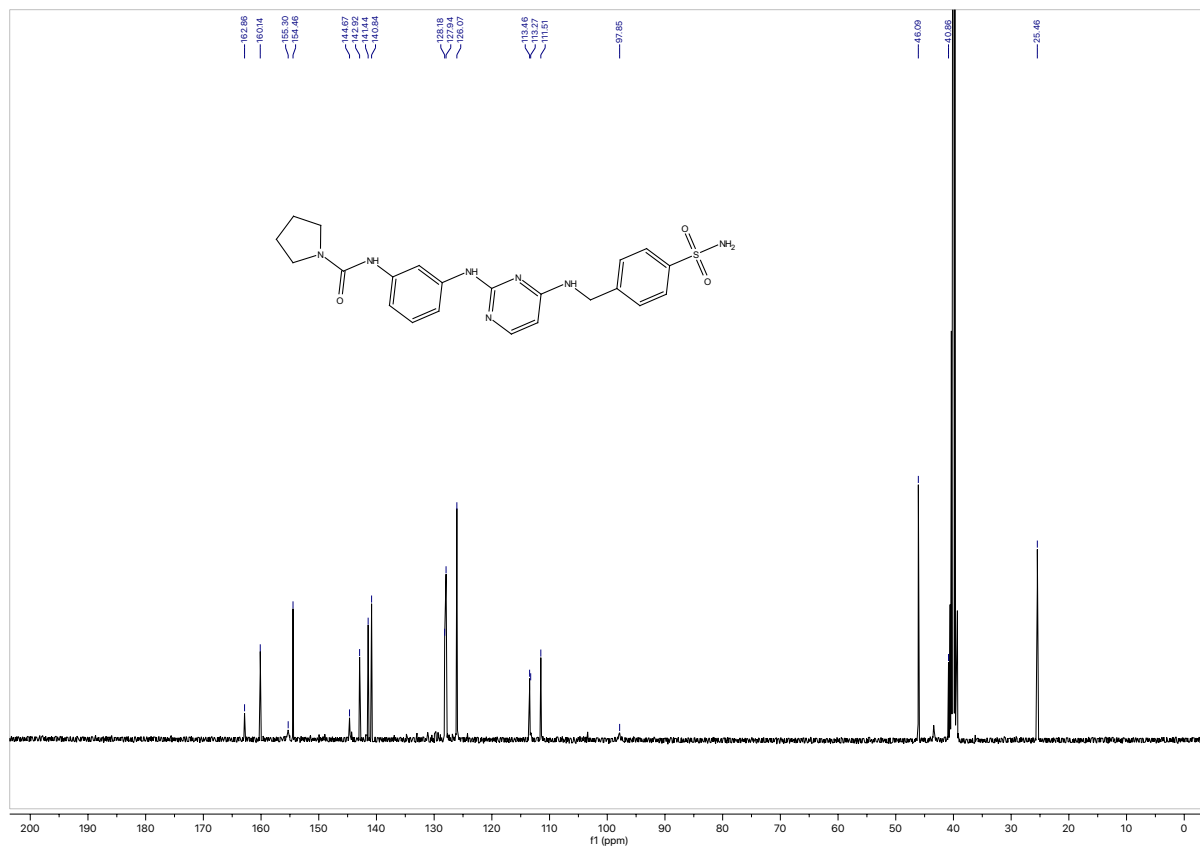

**<sup>1</sup>H NMR of N-(3-((4-((3-(cyclobutanecarboxamido)propyl)amino)pyrimidin-2-yl)amino)phenyl)pyrrolidine-1-carboxamide (17)**

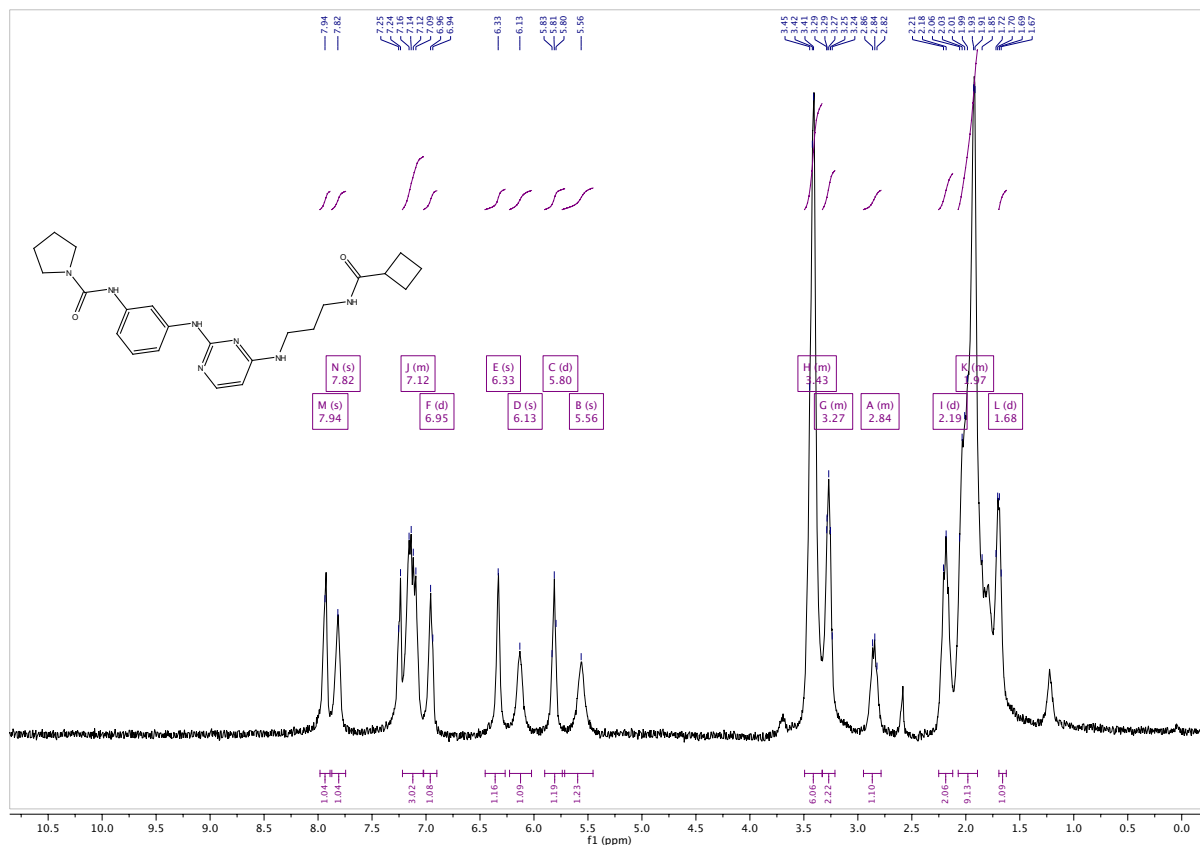

**<sup>13</sup>C NMR of N-(3-((4-((3-(cyclobutanecarboxamido)propyl)amino)pyrimidin-2-yl)amino)phenyl)pyrrolidine-1-carboxamide (17)**

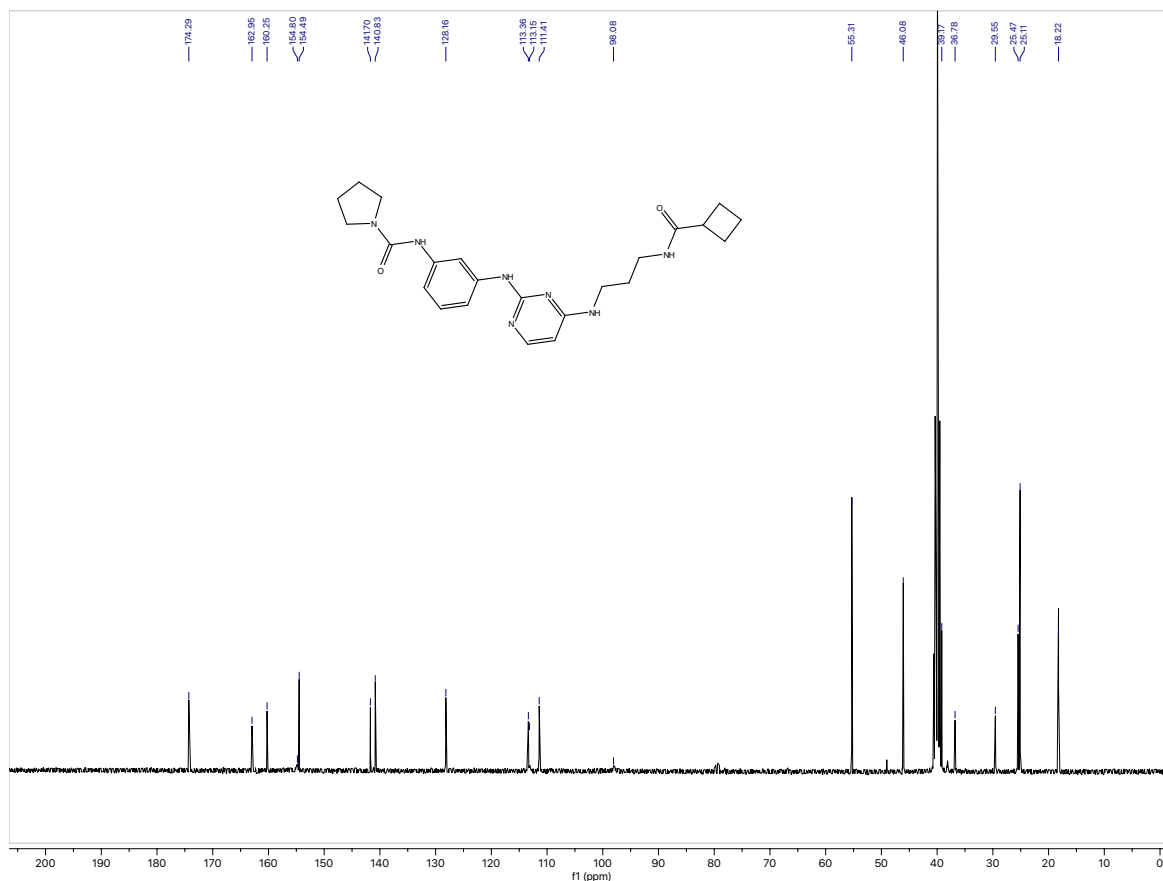

**<sup>1</sup>H NMR of N-(3-((5-bromo-4-((3-(cyclobutanecarboxamido)propyl)amino)pyrimidin-2-yl)amino)phenyl)pyrrolidine-1-carboxamide (18)**

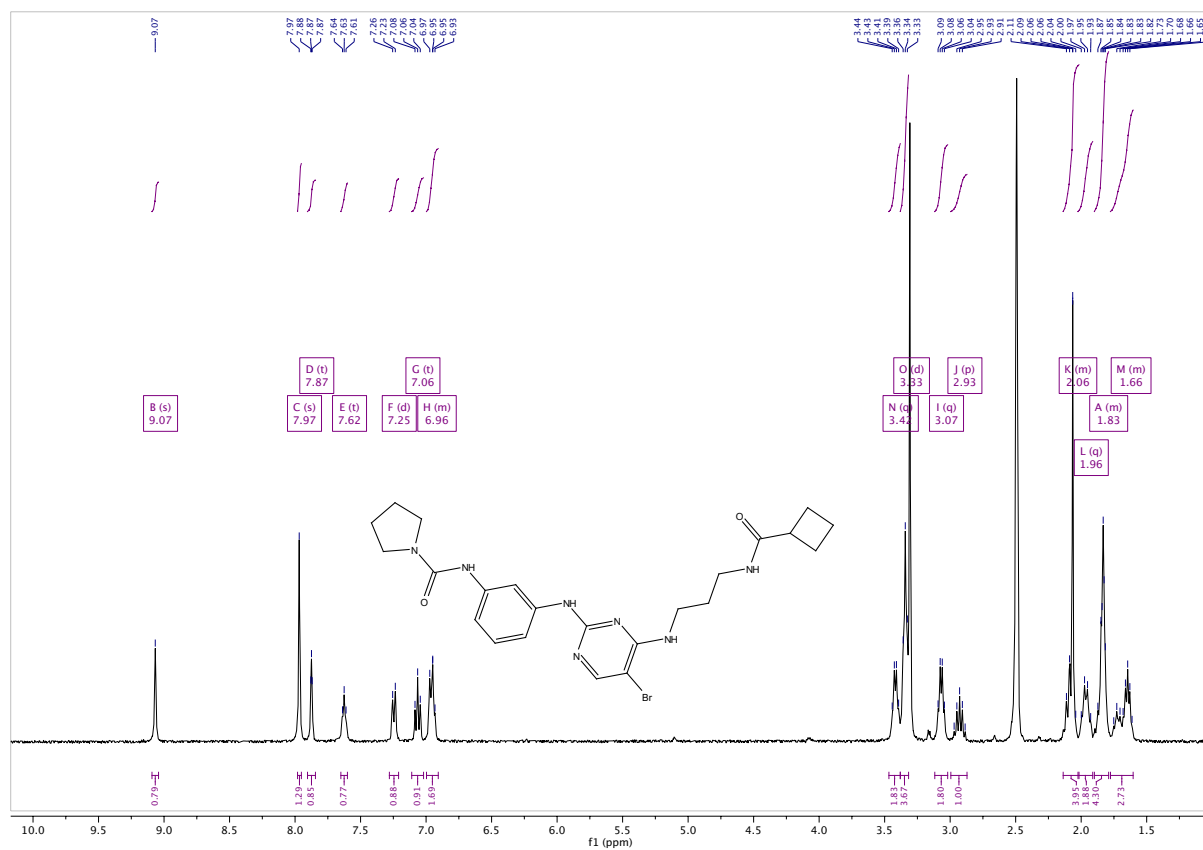

**<sup>13</sup>C NMR of N-(3-((5-bromo-4-((3-(cyclobutanecarboxamido)propyl)amino)pyrimidin-2-yl)amino)phenyl)pyrrolidine-1-carboxamide (18)**

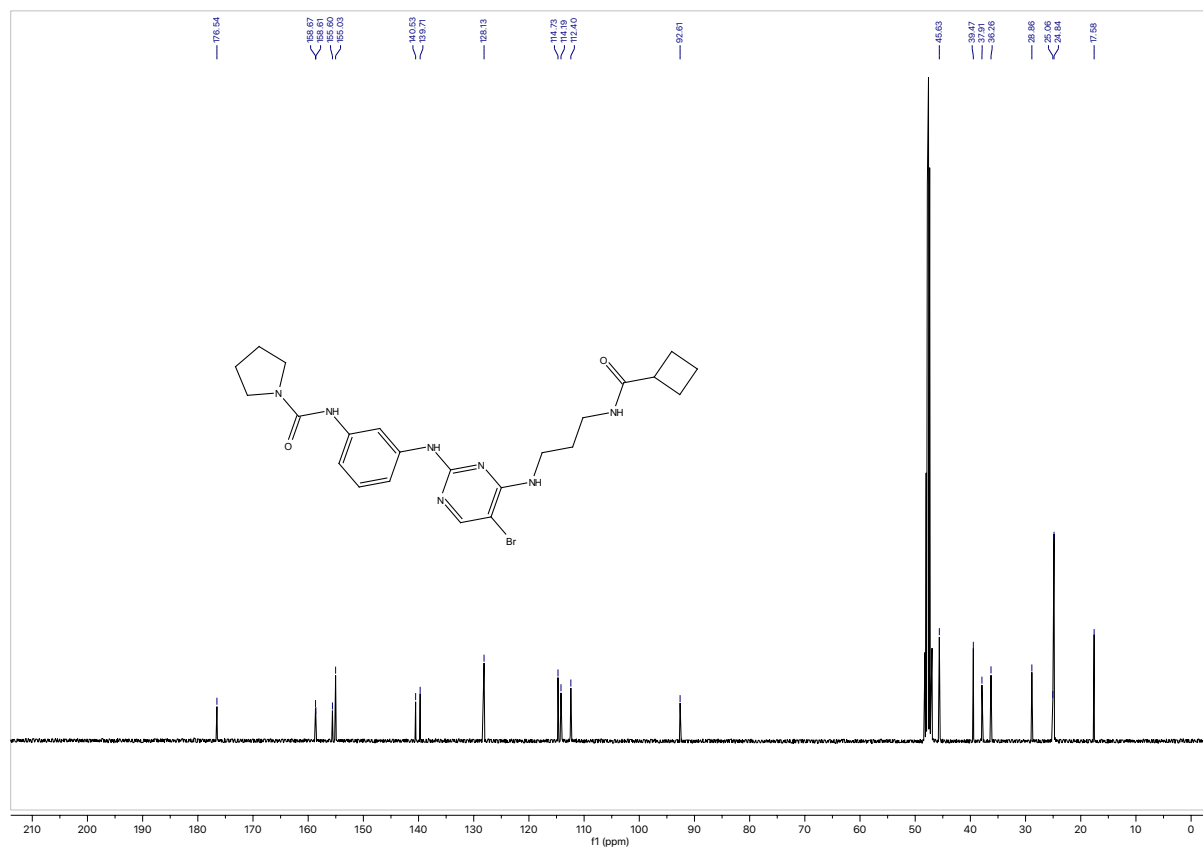

**<sup>1</sup>H NMR of 4-(((2-((3-(morpholinomethyl)phenyl)amino)pyrimidin-4-yl)amino)methyl)benzenesulfonamide (19)**

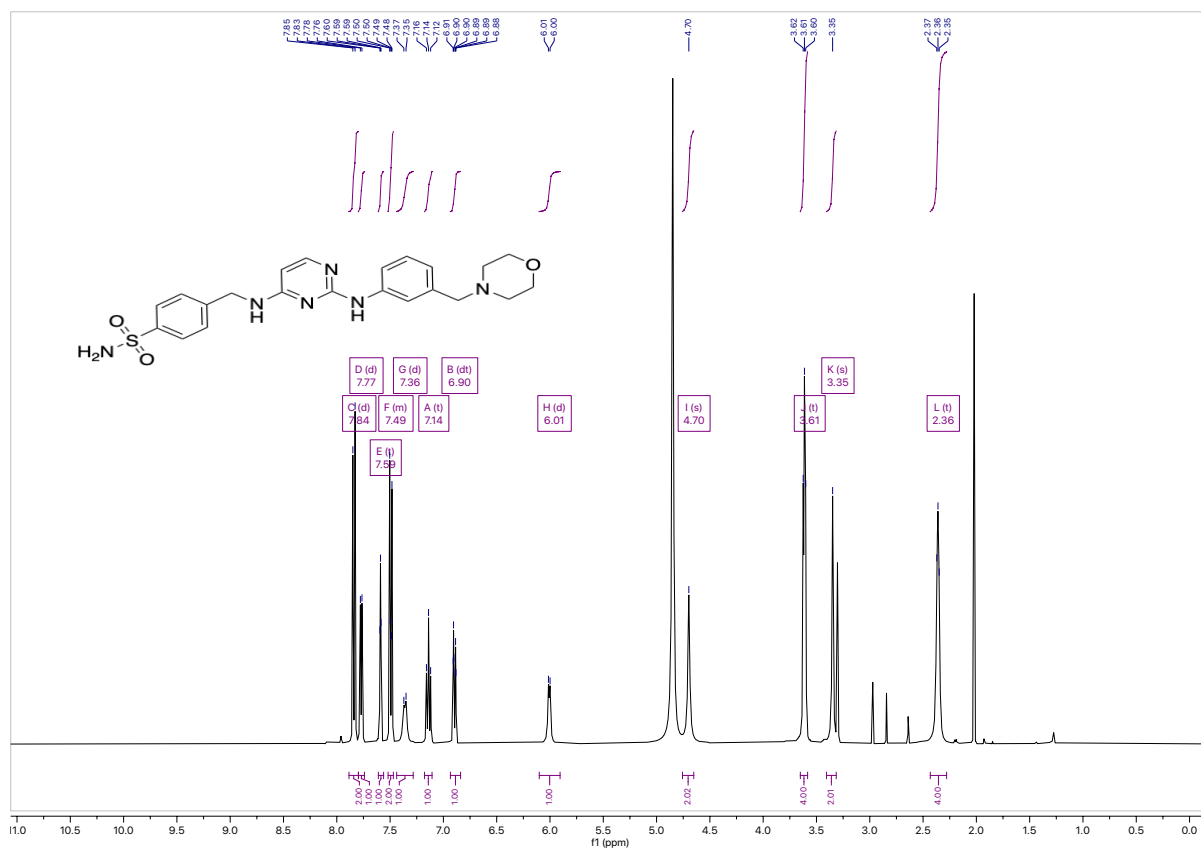

**<sup>13</sup>C NMR of 4-(((2-((3-(morpholinomethyl)phenyl)amino)pyrimidin-4-yl)amino)methyl)benzenesulfonamide (19)**

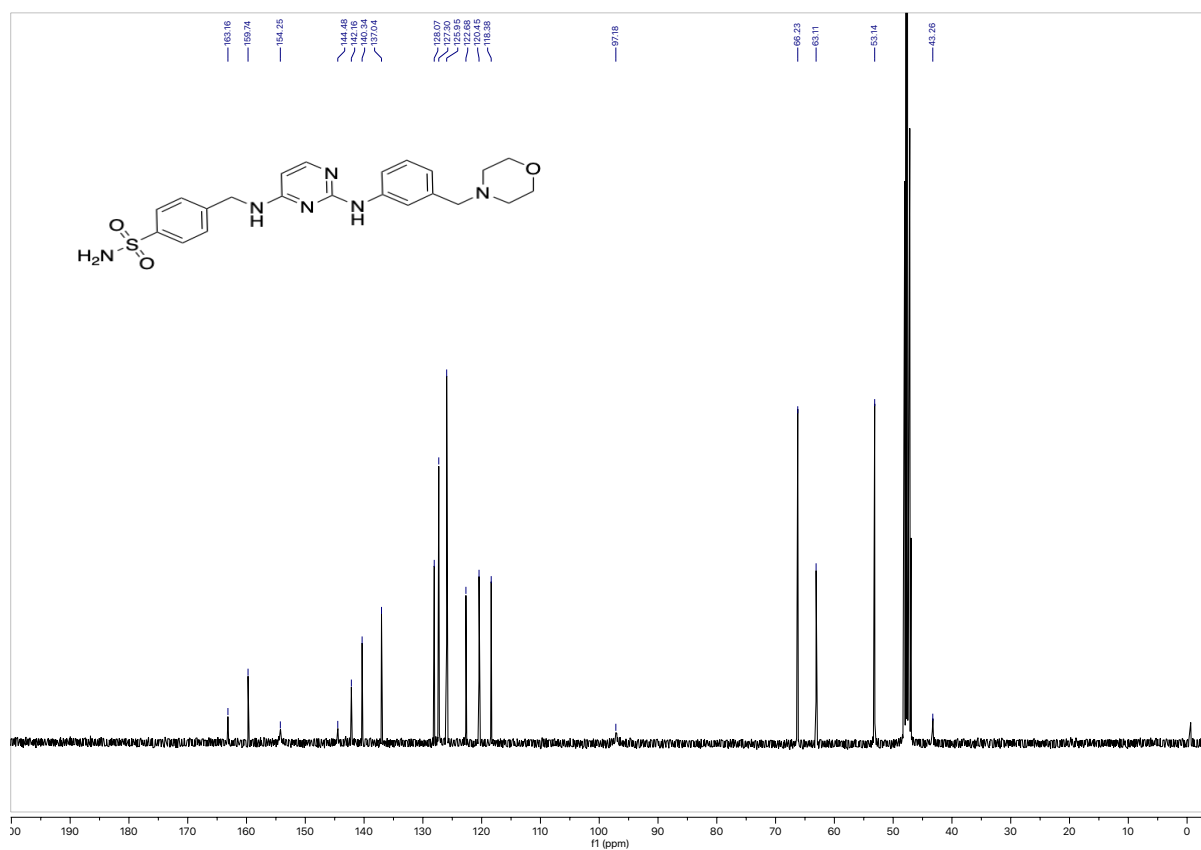

**<sup>1</sup>H NMR of N<sup>4</sup>-(2-(1H-imidazol-5-yl)ethyl)-N<sup>2</sup>-(3-(morpholinomethyl)phenyl)pyrimidine-2,4-diamine (20)**

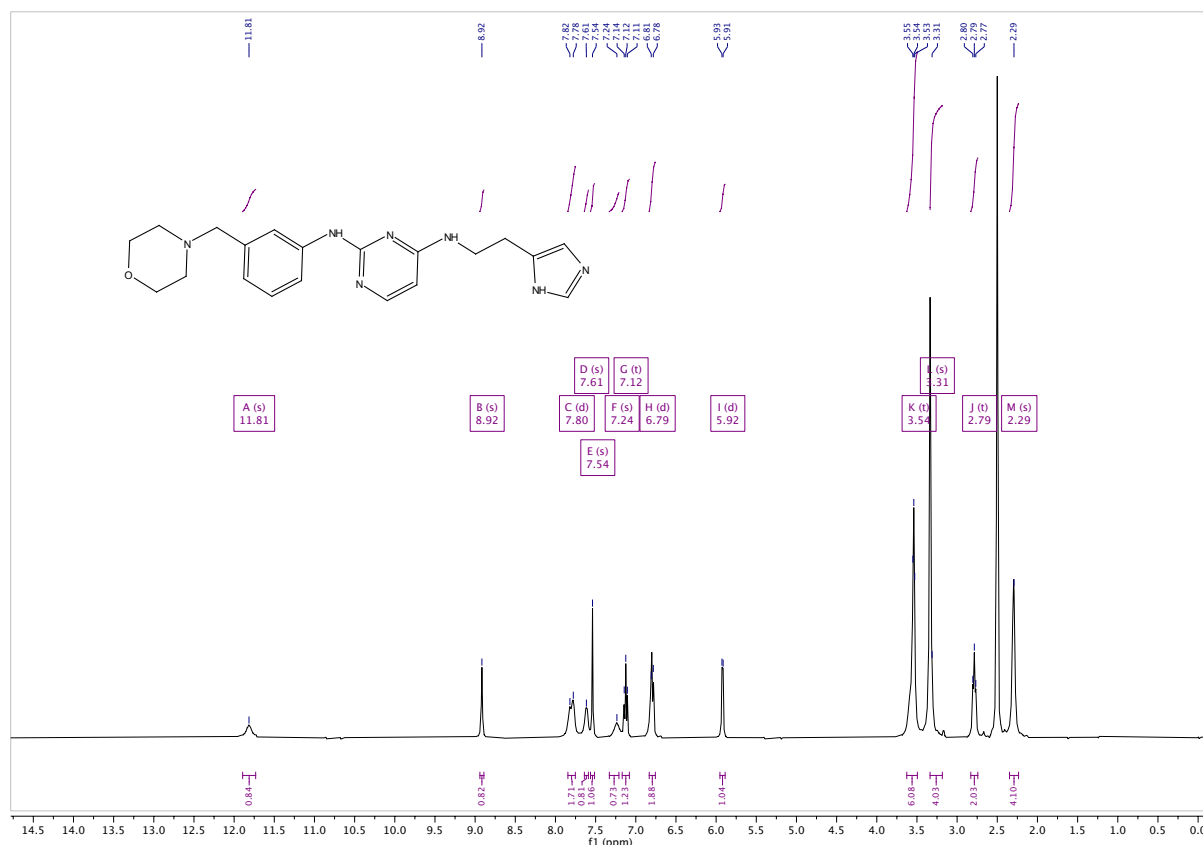

**<sup>13</sup>C NMR of N<sup>4</sup>-(2-(1H-imidazol-5-yl)ethyl)-N<sup>2</sup>-(3-(morpholinomethyl)phenyl)pyrimidine-2,4-diamine (20)**

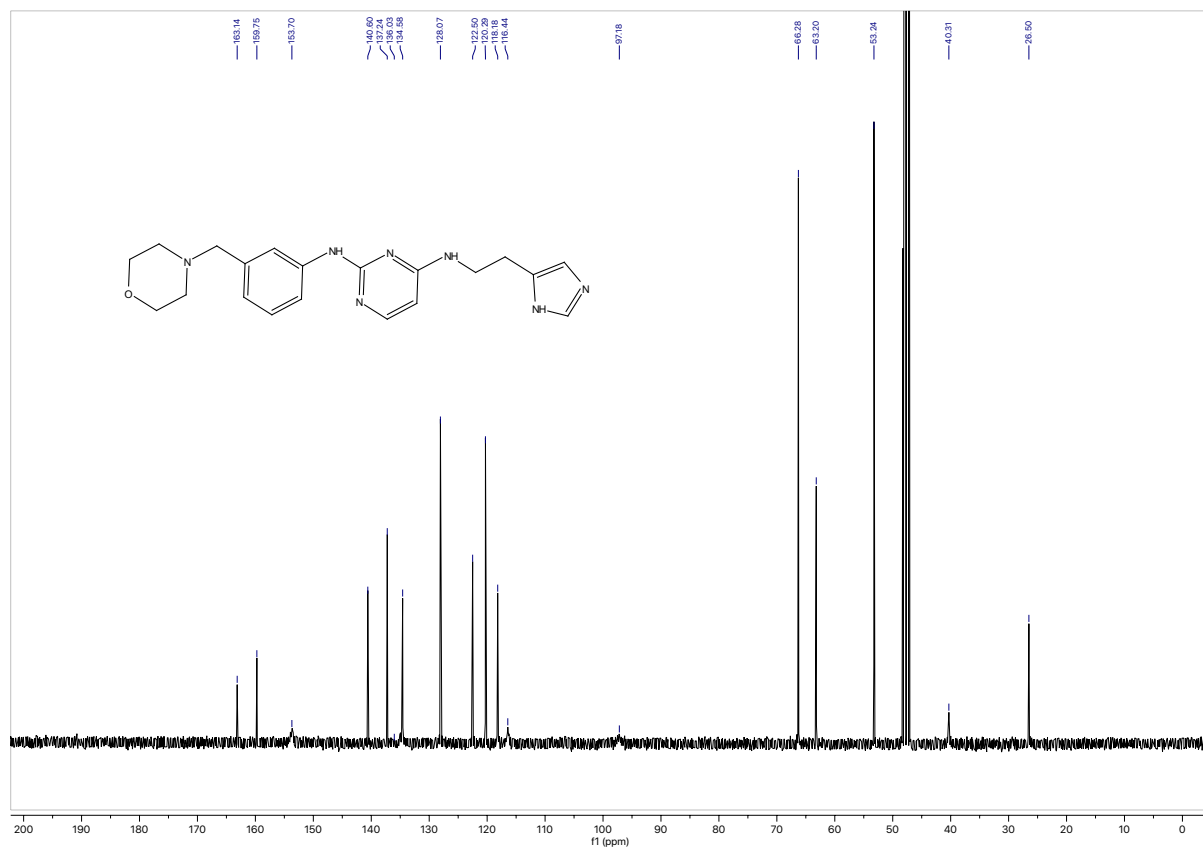

**<sup>1</sup>H NMR of N-(3-((5-cyclopropyl-4-((4-sulfamoylbenzyl)amino)pyrimidin-2-yl)amino)phenyl)pyrrolidine -1-carboxamide (21)**

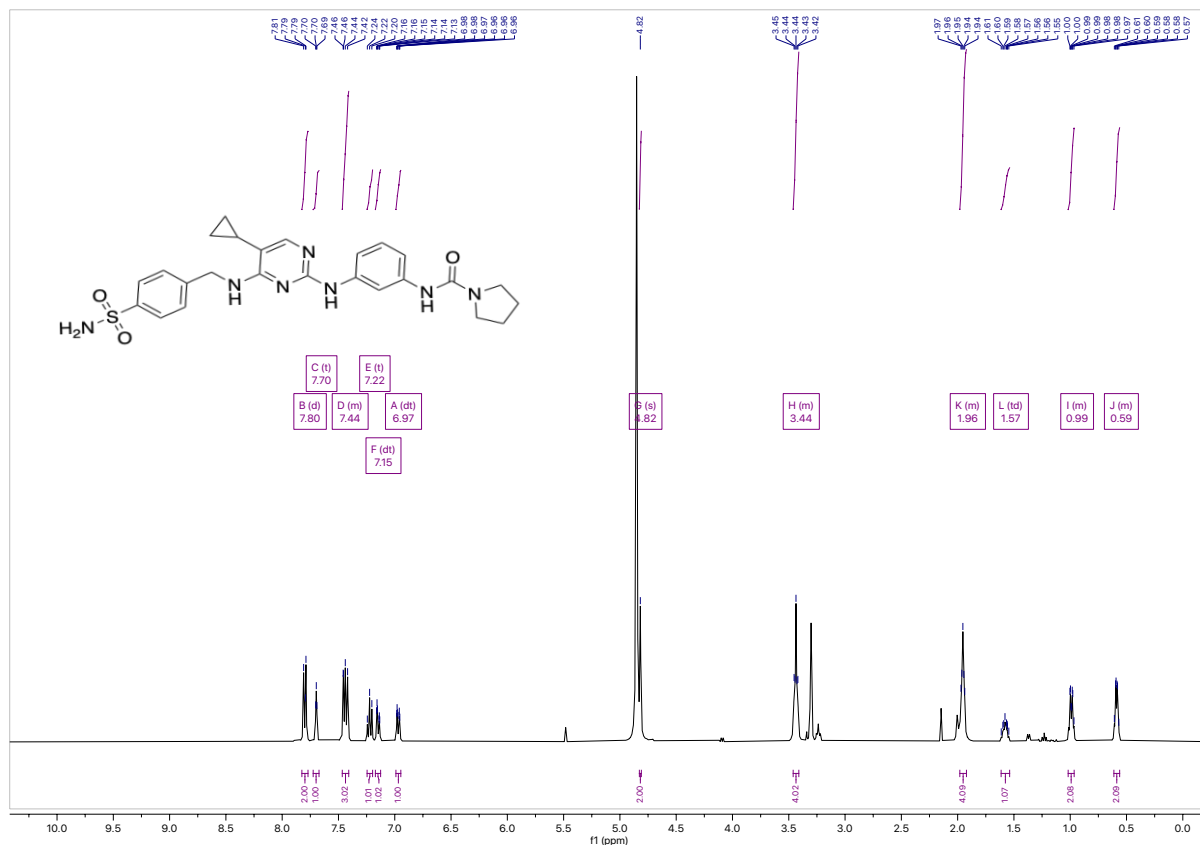

**<sup>13</sup>C NMR of N-(3-((5-cyclopropyl-4-((4-sulfamoylbenzyl)amino)pyrimidin-2-yl)amino)phenyl)pyrrolidine -1-carboxamide (21)**

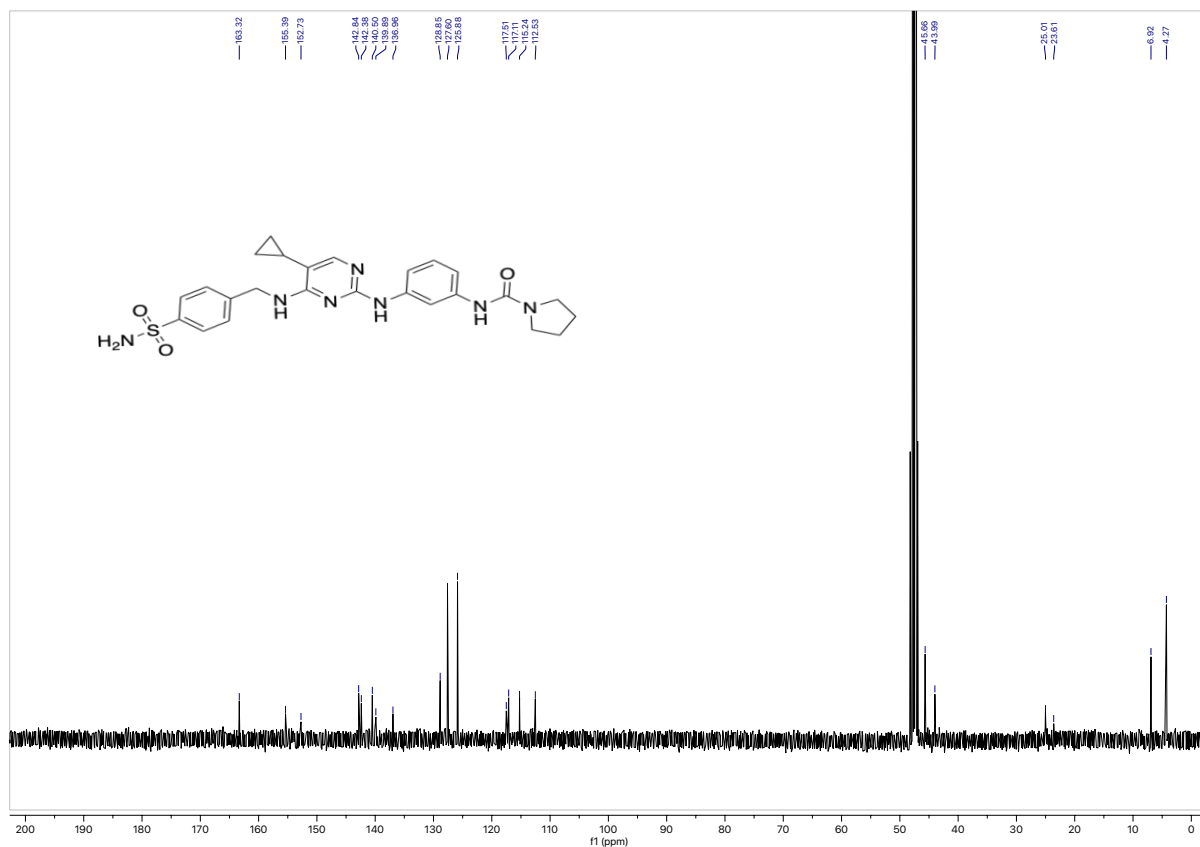

**<sup>1</sup>H NMR of N-(3-((4-((3-(cyclobutanecarboxamido)propyl)amino)-5-cyclopropylpyrimidin-2-yl)amino)phenyl)pyrrolidine-1-carboxamide (22)**

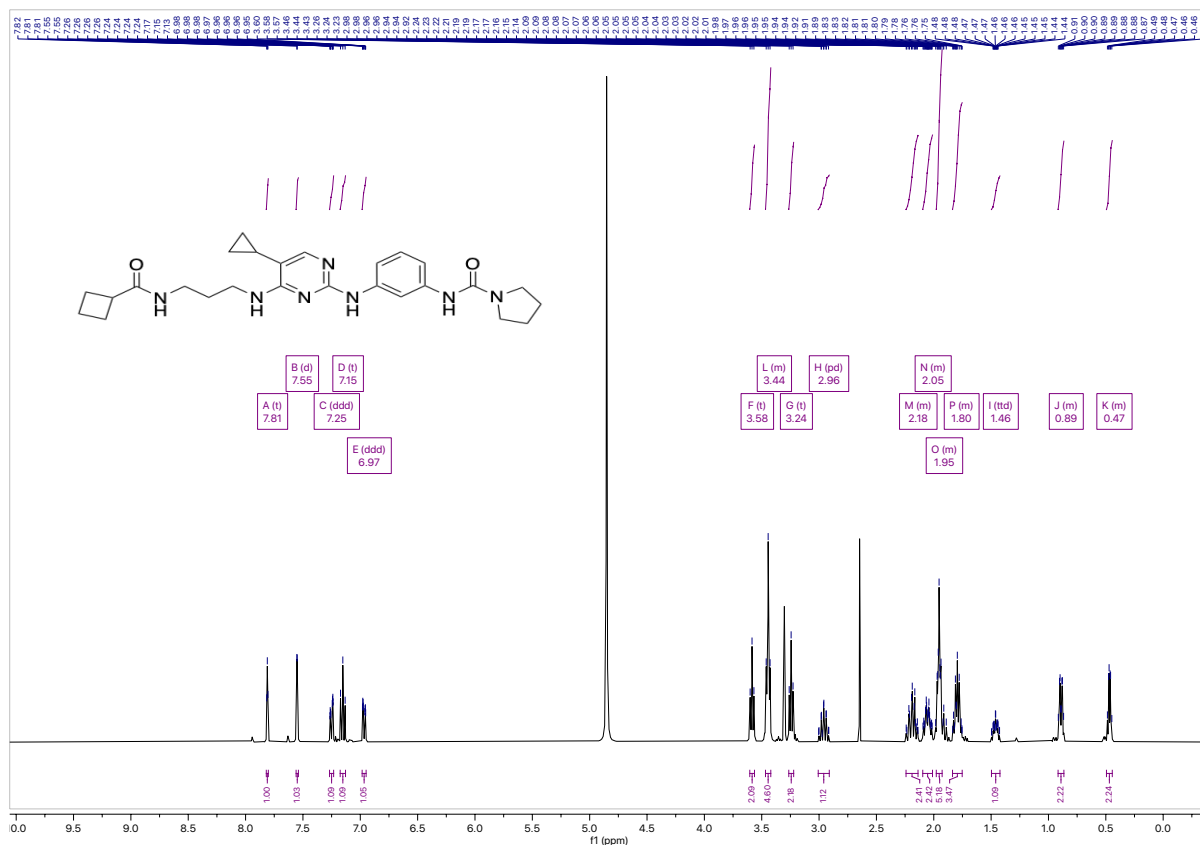

**<sup>13</sup>C NMR of N-(3-((4-((3-(cyclobutanecarboxamido)propyl)amino)-5-cyclopropylpyrimidin-2-yl)amino)phenyl)pyrrolidine-1-carboxamide (22)**

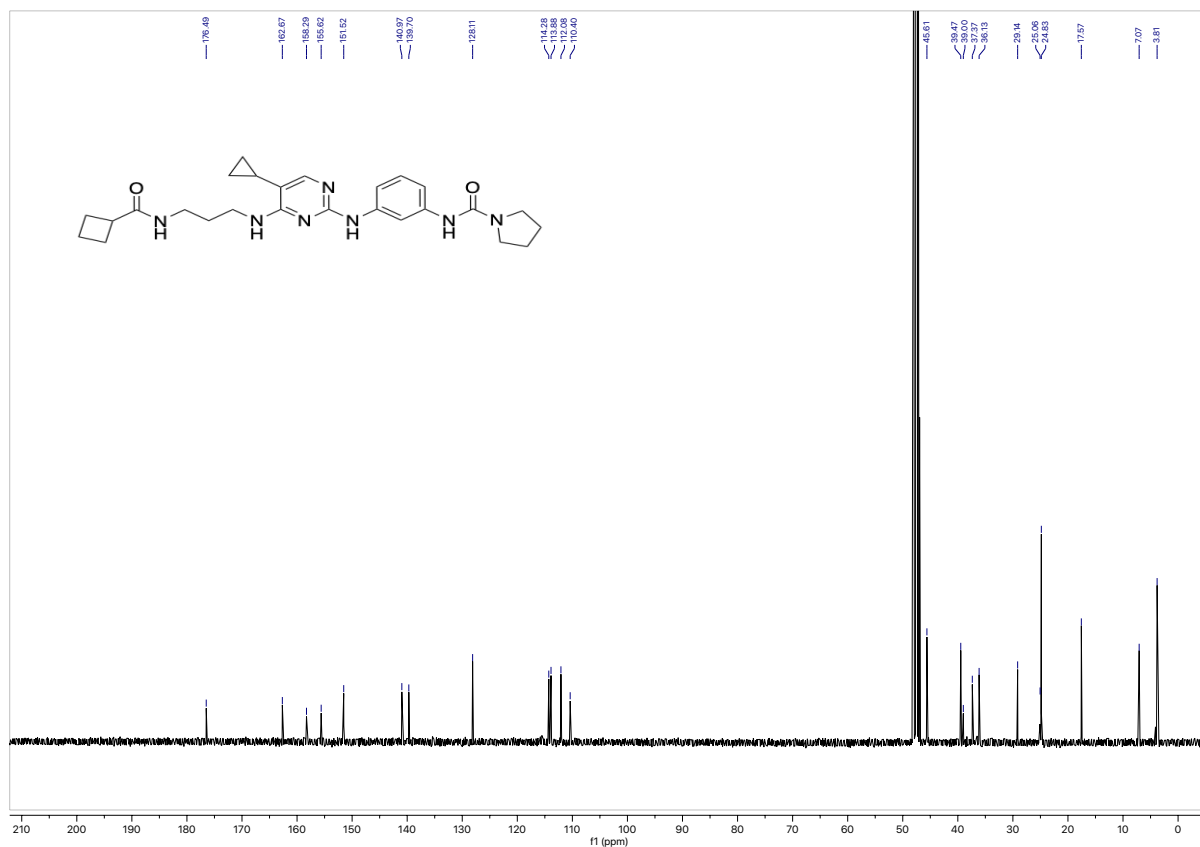

**$^1\text{H}$  NMR of 4-(((5-bromo-2-((3-methyl-1-(2,2,2-trifluoroethyl)-1H-pyrazol-4-yl)amino)pyrimidin-4-yl)-amino)methyl)benzenesulfonamide (GSK8612)**

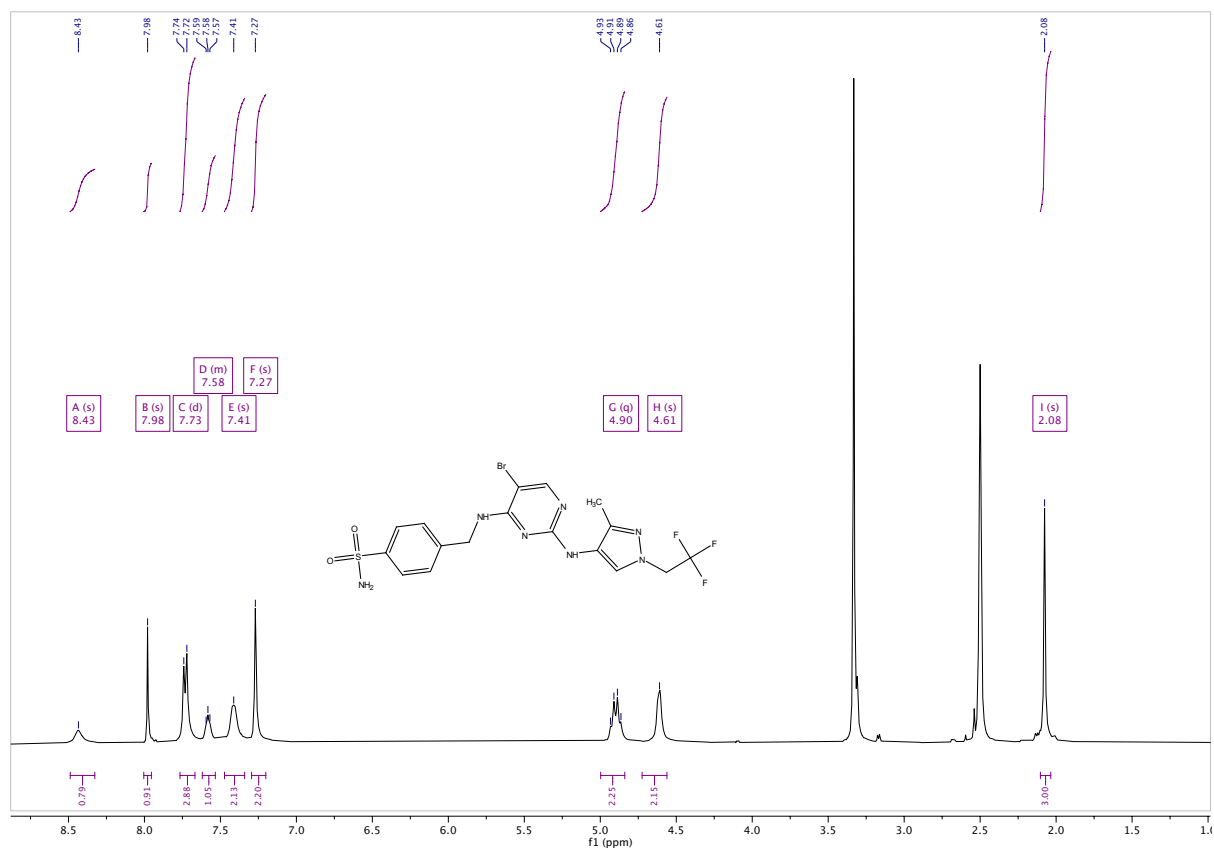

**$^{13}\text{C}$  NMR of 4-(((5-bromo-2-((3-methyl-1-(2,2,2-trifluoroethyl)-1H-pyrazol-4-yl)amino)pyrimidin-4-yl)-amino)methyl)benzenesulfonamide (GSK8612)**

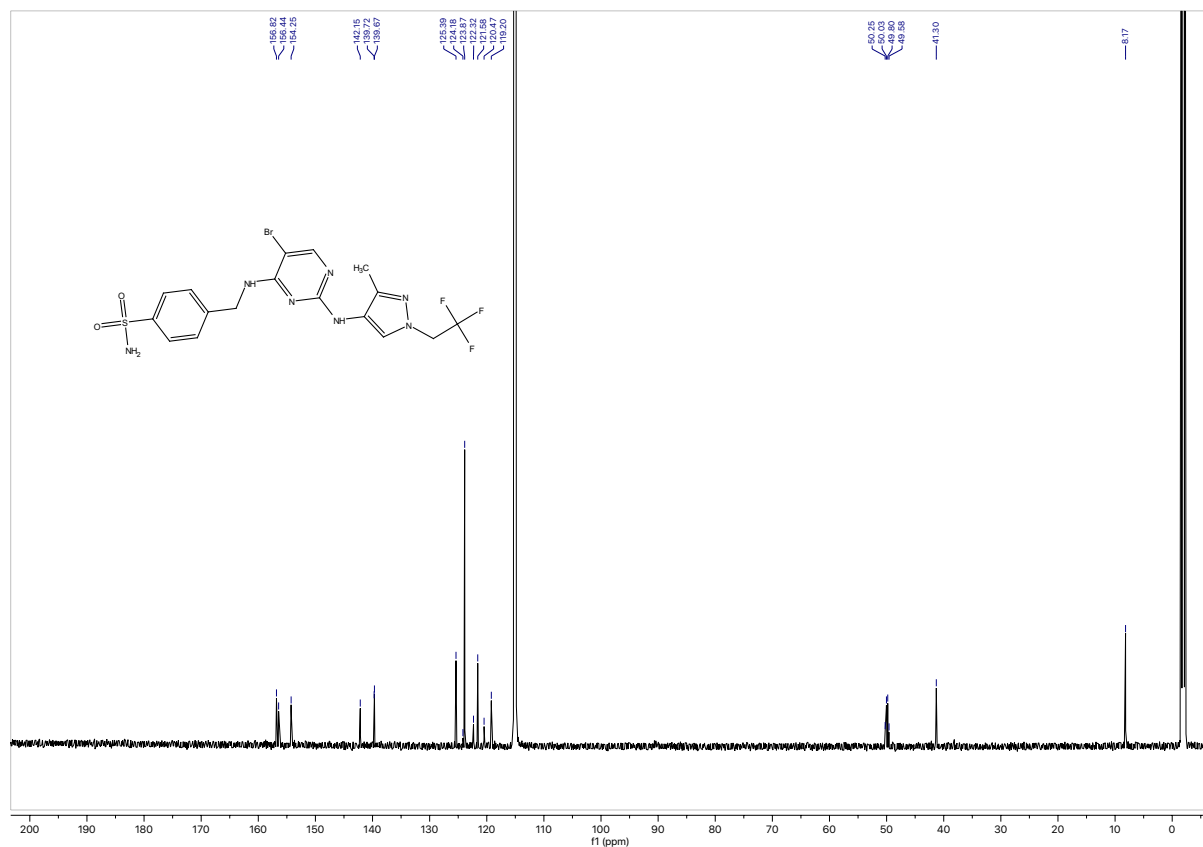

Supplement: jm1c00440_si_001.pdf [file jm1c00440_si_001.pdf]
